---

**List of email addresses and ORCIDs for all authors:**

Daniele Mercatelli, [daniele.mercatelli2@unibo.it](mailto:daniele.mercatelli2@unibo.it), ORCID 0000-0003-3228-0580  
 Luca Triboli, [luca.triboli@studio.unibo.it](mailto:luca.triboli@studio.unibo.it), ORCID 0000-0002-1261-0637  
 Eleonora Fornasari, [eleonora.fornasari@ordingbo.it](mailto:eleonora.fornasari@ordingbo.it), ORCID 0000-0002-7636-085X  
 Forest Ray, [forest.ray@zoho.com](mailto:forest.ray@zoho.com), ORCID 0000-0002-8655-7066  
 Federico M. Giorgi, [federico.giorgi@unibo.it](mailto:federico.giorgi@unibo.it), ORCID 0000-0002-7325-9908

***coronapp*: A Web Application to Annotate and Monitor  
 SARS-CoV-2 Mutations**

Daniele Mercatelli<sup>1,#</sup>, Luca Triboli<sup>1,#</sup>, Eleonora Fornasari<sup>1</sup>, Forest Ray<sup>2</sup>, Federico M. Giorgi<sup>1,\*</sup>

<sup>1</sup> *Department of Pharmacy and Biotechnology, University of Bologna, Bologna, 40126, Italy*

<sup>2</sup> *Department of Systems Biology, Columbia University Medical Center, New York City, 10032, United States*

# Equal contribution.

\* Corresponding author.

E-mail: [federico.giorgi@unibo.it](mailto:federico.giorgi@unibo.it) (Giorgi FM)

**Running title:** *Mercatelli D et al / coronapp – monitoring SARS-CoV-2 mutations*

Word number: 3531

Figure number: 3

## 26 Abstract

27 The avalanche of genomic data generated from the SARS-CoV-2 virus requires the  
 28 development of tools to detect and monitor its mutations across the World. Here, we  
 29 present a webtool, *coronapp*, dedicated to easily processing user-provided  
 30 SARS-CoV-2 genomic sequences, in order to detect and annotate protein-changing  
 31 mutations. This results in an up-to-date status of SARS-CoV-2 mutations, both  
 32 worldwide and in user-selected countries. The tool allows users to highlight and  
 33 prioritize the most frequent mutations in specific protein regions, and to monitor their  
 34 frequency in the population over time.

35 The tool is available at <http://giorgilab.dyndns.org/coronapp/> and the full code is  
 36 freely shared at <https://github.com/federicogiorgi/giorgilab/tree/master/coronapp>

37

38

39

40

41

42 **KEYWORDS:** COVID-19; SARS-CoV-2; mutations; web application

43

44

## Introduction

SARS-CoV-2 is a novel pathogenic enveloped RNA beta-coronavirus causing a severe illness in human hosts known as coronavirus disease-2019 (COVID-19). The predominant COVID-19 illness is a viral pneumonia, often requiring hospitalization and in some cases intensive care [1]. With almost 6 million laboratory-confirmed positive cases worldwide as of 31 May 2020 and an estimated case fatality rate across 204 countries of 5.2%, COVID-19 has become a global health challenge in only a few months [2]. SARS-CoV-2 infection depends on the recognition of host angiotensin converting enzyme 2 (ACE2), exposed on the cell surface in human lung tissues [3,4]. SARS-CoV-2 spike glycoprotein binds ACE2, mediating membrane fusion and cell entry [5]. Upon cell entry, the virus subverts host cell molecular processes, inducing interferon responses and eventually apoptosis [6].

To date, much effort has been made to develop therapeutic strategies to limit SARS-CoV-2 transmission and replication, but no treatment or vaccine has proven effective against the virus, and repurposing of approved therapeutic agents has been the main practical approach to manage the emergency so far [7]. As viruses mutate during replication, the emergence of SARS-CoV-2 sub-strains and the challenge of a probable antigenic drift require attention, especially for vaccine development [8].

Although sequence analyses of SARS-CoV-2 have shown that genomic variability is very low [9], new SARS-CoV-2 mutation hotspots are emerging due to the high number of infected individuals across countries and to viral replication rates [10]. Three major SARS-CoV-2 clades known as clade G, V, and S have emerged, showing a different geographical prevalence [10]. The most frequent mutation detected so far defines the G clade and causes an aminoacidic change, aspartate (D) or glycine (G), at position 614 (D614G) of the viral Spike protein [11].

Continual genomic surveillance should be considered to monitor the possible appearance of viral subtypes characterized by altered tropism, or causing more aggressive symptoms. Constant and widespread monitoring of mutations is also a

powerful means of informing drug development and global or local pandemic management. The Global Initiative on Sharing All Influenza Data (GISAID) has collected to date (31 May 2020) over 30,000 publicly accessible SARS-CoV-2 sequences. The GISAID effort has made it possible to compare genomes on a geographical and temporal scale and an increasing number of laboratories have started to sequence COVID-19 patient samples worldwide [13,14]. Several online tools have been developed to monitor the evolution of the virus from a phylogenetic perspective, such as Nextstrain [15], or to visualize epidemiological data such as number of cases and deaths [16]. However, no tool currently exists to annotate user-provided SARS-CoV-2 genomic sequences, which may derive from specific GISAID subsets or from sequencing efforts of individual laboratories. Neither does any tool specifically monitor the prevalence of specific SARS-CoV-2 mutations associated to particular geographic regions or protein locations, nor their frequency in the population over time.

To overcome these limitations, we have developed *coronapp*, a web application with two purposes: real-time tracking of SARS-CoV-2 mutational status and annotation of user-provided viral genomic sequences. Our tool enables users to easily perform genomic comparisons and provides an instrument to monitor SARS-CoV-2 genomic variance, both worldwide and by uploading custom and locally produced genomic sequences. The webtool is available at <http://giorgilab.dyndns.org/coronapp/> and the full source code is shared on Github <https://github.com/federicogiorgi/giorgilab/tree/master/coronapp>

## Results

The webtool *coronapp* is available at the website <http://giorgilab.dyndns.org/coronapp/> and it automatically provides the user with the current status of SARS-CoV-2 mutations worldwide. The app also allows users to

100 annotate user-provided sequences (Figure 1 A). There are multiple functionalities of  
101 *coronapp*, described in the following paragraphs.

102

### 103 **Current Status of SARS-CoV-2 mutational data**

104 A worldwide analysis is shown, generated using data from GISAID. Specifically, we  
105 processed all SARS-CoV-2 complete (>29,000 sequenced nucleotides) genomic  
106 sequences, excluding low-quality sequences (>5% undefined nucleotide “N”) and  
107 viruses extracted from non-human hosts.

108 The underlying database is updated weekly, and we provide the date of the last  
109 version as a reference for studies based on the data provided. We indicate the number  
110 of samples processed and the total number of mutational events detected (Figure 1 A).  
111 We also show the number of distinct mutated loci. Currently, this number is slightly  
112 below 11,000, meaning that less than half of the original Wuhan SARS-CoV-2  
113 genome has been affected by mutations and/or sequencing errors (the full length of  
114 the reference genome is 29,903 nucleotides, based on sequence id NC\_045512.2).

115

### 116 **Mutation frequency in SARS-CoV-2 proteins**

117 We show the frequency of mutations along the length of every SARS-CoV-2 protein,  
118 reporting in the X-axis the amino acid position and on the Y-axis its frequency, either  
119 as number of observed samples carrying the mutation, the base 10 logarithm of that  
120 number, or the percentage over all sequenced samples. In the example in Figure 1 B,  
121 we show the most frequent mutations affecting the viral Spike protein S,  
122 distinguishing silent mutations and amino acid-changing mutations (including the  
123 introduction of STOP codons). For Spike, the mutations appear to be evenly  
124 distributed in frequency along the protein length, with the most frequent mutation  
125 being the aforementioned D614G. Mouse-over functionality is provided to allow the  
126 user to identify the selected mutation (N439K in Figure 1 B).

127

## 128    **The SARS-CoV-2 mutation table**

129    The user can visualize or download the full table of mutations on which the webtool  
130    operates (Figure 2 A). This table is frequently updated and allows the user to specify a  
131    worldwide or a country-specific dataset. The table also provides a Search function to  
132    look for specific variants or sample ids, and it can be viewed online or downloaded in  
133    full as a Comma-Separated Values (CSV) file.

134    The table shows every mutation in a specific geographical area, reporting:

- 135    • the GISAID sample ID (useful for cross-reference with the GISAID database  
136    and other analyses based on it, e.g. Nexstrain).
- 137    • The country where the sample was collected.
- 138    • The position of the mutation, on the reference genome (refpos) and on the  
139    sample (qpos).
- 140    • The sequence at the mutation site, on the reference genome (refvar) and on the  
141    sample (qvar).
- 142    • The length of the sample genome (qlength); the reference genome is 29,903  
143    nucleotides long.
- 144    • The protein affected by the mutation or, if the mutation is extragenic, the  
145    denomination of the untranslated region (UTR), e.g. 5'UTR or 3'UTR.
- 146    • The effect of the mutation on the amino acid sequence of the protein (variant).  
147    This uses the canonical mutational standard, indicating the original amino  
148    acid(s), the position on the protein, and the mutated amino acid(s). An asterisk  
149    (\*) indicates a STOP codon, while the letters indicate amino acids in IUPAC  
150    code. E.g. a mutation P315L indicates a leucine mutation (L) on the amino  
151    acid location 315, normally occupied by a proline (P). Nucleotide mutations  
152    can be silent, i.e. not yielding any aminoacidic change, e.g. the mutation  
153    F106F, where the codon of phenylalanine 106 is affected but without changing  
154    the corresponding amino acid. As in the previous column, mutations affecting  
155    UTR regions are simply reported as the location of the nucleotide affected.

- 
- 156       • The class of the mutation, of which there are currently 10 types:
    - 157           ○ SNP: a change of one or more nucleotides, determining a change in
    - 158           amino acid sequence.
    - 159           ○ SNP\_stop: a change of one or more nucleotides, yielding the generation
    - 160           of one or more STOP codons.
    - 161           ○ SNP\_silent: a change of one or more nucleotides with no effect in
    - 162           protein sequence.
    - 163           ○ Insertion: the insertion of 3 (or multiples of 3) nucleotides, causing the
    - 164           addition of 1 or more amino acids to the protein sequence.
    - 165           ○ Insertion\_stop: the insertion of 3 (or multiples of 3) nucleotides, causing
    - 166           the generation of a novel STOP codon.
    - 167           ○ Insertion\_frameshift: the insertion of nucleotides not as multiples of 3,
    - 168           causing a frameshift mutation.
    - 169           ○ Deletion: the deletion of 3 (or multiples of 3) nucleotides, causing the
    - 170           removal of 1 or more amino acids to the protein sequence.
    - 171           ○ Deletion\_stop: the removal of 3 (or multiples of 3) nucleotides, causing
    - 172           the generation of a novel STOP codon.
    - 173           ○ Deletion\_frameshift: the deletion of nucleotides not as multiples of 3,
    - 174           causing a frameshift mutation.
    - 175           ○ Extragenic: a mutation affecting intergenic or UTR regions.
  - 176       • The extended annotation of the protein region affected by the mutation (e.g.
  - 177       “Spike” for “S” or “Predicted phosphoesterase, papain-like proteinase” for
  - 178       NSP3, the Non-Structural Protein 3).
  - 179       • The full name of the variant (varname), in the format
  - 180       proteinName:AApositionAA, to allow for unique denomination of viral
  - 181       proteome variants.

182

## 183   **Mutational overview**

The user is also provided with a general overview of the mutational status of the selected country or the entire world (Figure 2 B). Six bar plots provide a summary and highlights of the dataset, specifically:

- The most mutated samples, indicating which samples (in GISAID IDs) carry the highest number of mutations
- The overall mutations per sample, indicating the distributions of mutations per sample. It has been previously reported [10] that the current mode for mutation number compared to the reference NC\_045512.2 genome is 7.5.
- The most frequent events per class. Classes are the same as reported in the mutation table and are described in the previous paragraph.
- The most frequent events per type. Individual mutation types are shown as specific nucleotides events, e.g. cytosine to thymidine transitions (C>T), guanosine to thymidine transversion (G>T) or even multinucleotide mutations (e.g. GGG>AAC, observed in the Nucleocapsid protein). As reported before, nucleotide transitions seem to be the most abundant SARS-CoV-2 type of mutational event worldwide [11].
- The most frequent events, either in nucleotide coordinates or in aminoacidic coordinates. Currently, the most frequent events are four mutations affecting SARS-CoV-2 genomes belonging to clade G, which is the most sequenced worldwide and predominant in Europe. These mutations are A23403G (associated to the already mentioned D614G mutation in the Spike protein), C3037T, C14408T and C241T.

## Analysis of mutations over time

The *coronapp* webtool allows users to monitor the abundance and frequency of any SARS-CoV-2 mutation in any country specified (Figure 3). Both plots in this section report continuous dates on the X-axis, starting on the day of the first collected SARS-CoV-2 genome available on GISAID: December 24, 2019.



---

The “abundance” plot reports on the Y-axis the number of samples carrying a selected mutation in a particular day, in the specified country or worldwide. Since the date reported is the collection date (not the submission date to the GISAID database), there is usually a drop towards the right part of the plot, as there are fewer sequences collected approaching the day of the analysis. The “frequency” plot on the other hand normalizes the abundance of mutations by the total number of sequences generated on each day. The plot currently shows a sharp increase in clade G-associated mutations (e.g. S:D614G), as these mutations are most frequent in countries where sequencing is more pervasive (e.g. United Kingdom).

### **Annotation of user-provided SARS-CoV-2 genomic sequence.**

*coronapp* provides the user with the optional possibility of uploading one or more SARS-CoV-2 genomic sequences, which can be complete or partial. The format of the sequences is standard FASTA, and an example input FASTA containing 12 sequences is provided (Figure 1 A). The analysis is almost instantaneous and shows an overall breakdown of the most mutated samples and most frequent mutations in the dataset. Moreover, a full table of all detected mutations is provided: this can be visualized and searched on the web browser or downloaded as a standard CSV file. Finally, a mutation frequency plot is provided, allowing the user to visualize mutation frequency in selected proteins.

The user can easily return to the worldwide status of the app by refreshing or reopening the page.

## **Discussion**

Our webtool *coronapp* provides a fast, simple tool to annotate user-provided SARS-CoV-2 genomes and visualize all mutations currently present in viral sequences collected worldwide. The results provided by this instrument can have several applications. The main purpose of *coronapp* is to help medical laboratories at

the front lines of COVID-19 fight with the opportunity to quickly define the mutational status of their sequences, even without dedicated bioinformaticians.

Additionally, it enables scientists to perform mutational co-variance analyses and to identify present and future significant functional interactions between viral mutations, as previously attempted for the influenza virus and the human immunodeficiency virus (HIV) [17]. Another application is the identification of the most frequent mutations in specific protein regions: for example, our tool can quickly identify that the most frequent mutation in the Spike protein, D614G, lies outside the known interaction domain with the human protein ACE2, which spans roughly between Spike amino acids 330 and 530 [18].

A recently published structural model simulating the effect of the D614G mutation on the 3D structure of the spike protein has suggested that this mutation may result in a viral particle which binds ACE2 receptors less efficiently, due to the masking of the host receptor binding site on viral spikes [12]. The same researchers have reported a possible correlation of the D614G form with increased case fatality rates, hypothesizing that this mutation may lead to a viral form which is better suited to escape immunologic surveillance by eliciting a lower immunologic response [12]. The *coronapp* analysis highlighted in Figure 1 B shows that a mutation located within the Spike/ACE2 interaction domain is the change of Asparagine (N) to a Lysine (K) in position 439 of the Spike sequence; this mutation could affect the protein folding or its affinity with ACE2, as Asparagine is less charged than the basic amino acid Lysine.

One of *coronapp*'s key strengths is to help prioritize scientific efforts on specific aminoacidic variations that could affect the efficacy of anti-viral strategies or the development of a vaccine by tracking the most frequent mutations in the population. A further novelty of *coronapp* is that it provides a mean to assess the growth or decline of specific mutations over time, in order to identify possible viral adaptation mechanisms.

---

We provide not only the webtool, but also all the underlying code for the annotation and visualization steps on a public Github repository, in order to help other computational scientists in the ongoing battle against COVID-19. Furthermore, the *coronapp* structure and concept could be expanded to other current and future pathogens as well (e.g. the seasonal influenza or HIV), in order to monitor the mutational status across proteins, countries and time.

## Materials and methods

The webtool *coronapp* has been developed using the programming language R and is based on a Shiny server (current version 1.4.0.2) running on R version 3.6.1. The app is based on two distinct files, *server.R* and *ui.R*, managing the server functionalities and the browser visualization processes, respectively. The results visualization utilizes both basic R functions and Shiny functionalities; for tooltip functionality, *coronapp* uses the R package *googleVis* v0.6.4, which provides an interface between R and the Google visualization API [19].

The core of the annotation of the user-provided sequences rests in the NUCMER (Nucleotide Mummer) alignment tool, version 3.1 [20]. Nucmer output is processed by UNIX and R scripts provided in Github within the *server.R* file.

## Authors' contributions

DM drafted the manuscript and performed the mutational analysis and literature search. LT developed the user interface code and drafted the methodological parts of the manuscript. EF worked on graphical interface of the webtool. FR wrote the manuscript and performed literature search. FMG designed the study, developed the server code, finalized the manuscript and provided financial support. All authors tested the webtool and provided original contributions to its development. All authors read and approve the final manuscript.

## Competing interests

The authors have declared no competing interests.

## Acknowledgements

We thank the Italian Ministry of University and Research for their support, under the Montalcini Grant 2016.

## References

- [1] Guan W-J, Ni Z-Y, Hu Y, Liang W-H, Ou C-Q, He J-X, et al. Clinical Characteristics of Coronavirus Disease 2019 in China. *N Engl J Med* 2020;382:1708–20. <https://doi.org/10.1056/NEJMoa2002032>.
- [2] Phua J, Weng L, Ling L, Egi M, Lim C-M, Divatia JV, et al. Intensive care management of coronavirus disease 2019 (COVID-19): challenges and recommendations. *Lancet Respir Med* 2020. [https://doi.org/10.1016/S2213-2600\(20\)30161-2](https://doi.org/10.1016/S2213-2600(20)30161-2).
- [3] Zhang H, Penninger JM, Li Y, Zhong N, Slutsky AS. Angiotensin-converting enzyme 2 (ACE2) as a SARS-CoV-2 receptor: molecular mechanisms and potential therapeutic target. *Intensive Care Med* 2020;46:586–90. <https://doi.org/10.1007/s00134-020-05985-9>.
- [4] Guzzi PH, Mercatelli D, Ceraolo C, Giorgi FM. Master Regulator Analysis of the SARS-CoV-2/Human Interactome. *J Clin Med* 2020;9:982. <https://doi.org/10.3390/jcm9040982>.
- [5] Ou X, Liu Y, Lei X, Li P, Mi D, Ren L, et al. Characterization of spike glycoprotein of SARS-CoV-2 on virus entry and its immune cross-reactivity with

- 
- 321 SARS-CoV. *Nat Commun* 2020;11:1620.  
322 <https://doi.org/10.1038/s41467-020-15562-9>.
- 323 [6] Blanco-Melo D, Nilsson-Payant BE, Liu W-C, Uhl S, Hoagland D, Møller R, et  
324 al. Imbalanced Host Response to SARS-CoV-2 Drives Development of  
325 COVID-19. *Cell* 2020;181:1036-1045.e9.  
326 <https://doi.org/10.1016/j.cell.2020.04.026>.
- 327 [7] Tu Y-F, Chien C-S, Yarmishyn AA, Lin Y-Y, Luo Y-H, Lin Y-T, et al. A Review  
328 of SARS-CoV-2 and the Ongoing Clinical Trials. *Int J Mol Sci* 2020;21.  
329 <https://doi.org/10.3390/ijms21072657>.
- 330 [8] Koyama T, Weeraratne D, Snowden JL, Parida L. Emergence of Drift Variants  
331 That May Affect COVID-19 Vaccine Development and Antibody Treatment.  
332 *Pathog Basel Switz* 2020;9. <https://doi.org/10.3390/pathogens9050324>.
- 333 [9] Ceraolo C, Giorgi FM. Genomic variance of the 2019-nCoV coronavirus. *J Med*  
334 *Virol* 2020;92:522–8. <https://doi.org/10.1002/jmv.25700>.
- 335 [10] Mercatelli D, Giorgi FM. Geographic and Genomic Distribution of SARS-CoV-2  
336 Mutations. Preprints; 2020. <https://doi.org/10.20944/preprints202004.0529.v1>.
- 337 [11] Chiara M, Horner DS, Gissi C, Pesole G. Comparative genomics suggests limited  
338 variability and similar evolutionary patterns between major clades of  
339 SARS-CoV-2. *BioRxiv*; 2020. <https://doi.org/10.1101/2020.03.30.016790>.
- 340 [12] Becerra-Flores M, Cardozo T. SARS-CoV-2 viral spike G614 mutation exhibits  
341 higher case fatality rate. *Int J Clin Pract* 2020. <https://doi.org/10.1111/ijcp.13525>.
- 342 [13] Gudbjartsson DF, Helgason A, Jonsson H, Magnusson OT, Melsted P, Norddahl  
343 GL, et al. Spread of SARS-CoV-2 in the Icelandic Population. *N Engl J Med*  
344 2020. <https://doi.org/10.1056/NEJMoa2006100>.
- 345 [14] Fauver JR, Petrone ME, Hodcroft EB, Shioda K, Ehrlich HY, Watts AG, et al.  
346 Coast-to-Coast Spread of SARS-CoV-2 during the Early Epidemic in the United  
347 States. *Cell* 2020;181:990-996.e5. <https://doi.org/10.1016/j.cell.2020.04.021>.
- 348 [15] Hadfield J, Megill C, Bell SM, Huddleston J, Potter B, Callender C, et al.  
349 Nextstrain: real-time tracking of pathogen evolution. *Bioinformatics*  
350 2018;34:4121–3. <https://doi.org/10.1093/bioinformatics/bty407>.
- 351 [16] Max Roser EO-O Hannah Ritchie, Hasell J. Coronavirus Pandemic (COVID-19).  
352 Our World Data 2020.
- 353 [17] Sruthi CK, Prakash MK. Statistical characteristics of amino acid covariance as  
354 possible descriptors of viral genomic complexity. *Sci Rep* 2019;9:18410.  
355 <https://doi.org/10.1038/s41598-019-54720-y>.
- 356 [18] Lan J, Ge J, Yu J, Shan S, Zhou H, Fan S, et al. Structure of the SARS-CoV-2  
357 spike receptor-binding domain bound to the ACE2 receptor. *Nature*  
358 2020;581:215–20. <https://doi.org/10.1038/s41586-020-2180-5>.
- 359 [19] Gesmann M, de Castillo D. Using the Google visualisation API with R. *R J*  
360 2011;3:40–44.

---

[20]Delcher AL, Salzberg SL, Phillippy AM. Using MUMmer to Identify Similar Regions in Large Sequence Sets. Curr Protoc Bioinforma 2003;00:10.3.1-10.3.18. <https://doi.org/10.1002/0471250953.bi1003s00>.

## Figure legends

### Figure 1 Overview of *coronapp*

**A.** Screenshot of the entry page of *coronapp* showing the basic tool description, the interface to upload user-provided sequences and the overall summary of the mutations detected worldwide. **B.** Common interface showing mutation frequency in SARS-CoV-2 proteins, with occurrence of the mutation on the Y-axis and protein coordinate on the X-axis. Red dots indicate amino acid (aa)-changing mutations, and blue dots indicate silent mutations. Tooltip functionality is also provided to identify and quantify each mutation on mouse-over.

### Figure 2 Mutation table and overview in *coronapp*

**A.** Result table of *coronapp*, available both for worldwide-precomputed and user-input analyses. A “download full table” button is provided to allow the user to perform larger-scale analyses autonomously. **B.** Barplots showing the most mutated samples, overall sample mutations and most frequent mutation events, classes and types. This analysis is also available both for worldwide-precomputed and user-input analyses.

### Figure 3 Analysis of mutations over time

The final output of *coronapp*, showing the abundance of each user-specified mutation in any user-specified country (or worldwide). The left graph indicates the absolute amount of samples where the indicated mutation is detected. The right graph shows the same data normalized by total number of samples, as the percentage of samples sequenced in a specific day and carrying the mutation.



A

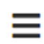

*coronapp* is a web application written in Shiny with a double purpose:

- Monitor SARS-CoV-2 worldwide mutations
- Annotate user-provided mutations

### Provide your own (multi)FASTA file

Browse...

No file selected

Example input multiFASTA

The FASTA annotator will discover and annotate every mutation present in the uploaded SARS-CoV-2 genomic sequences, even partial. The GFF3 genome annotation file

is available here <https://doi.org/10.1101/2020.05.31.124966> this version posted June 1, 2020. The copyright holder for this preprint (which was not certified by peer review) is the author/funder, who has granted bioRxiv a license to display the preprint in perpetuity. It is made available under aCC-BY-NC 4.0 International license.

is available here

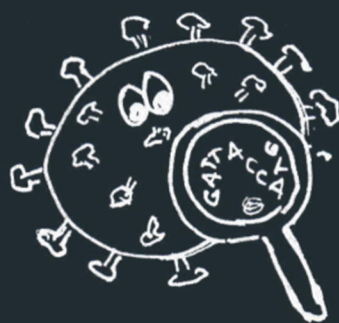

## Current Status of SARS-CoV-2 mutational data

updated May 30, 2020

Number of samples: 29668

Number of distinct mutated loci: 10458

Total number of mutational events: 203292

Select

Country:

World

Select Protein:

S

☒ Log10

☐ Percentage

### Mutation frequency for protein S (Spike) in World

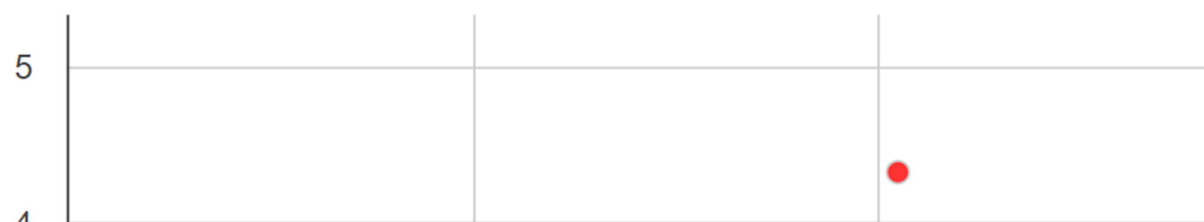

B

### Mutation frequency for protein S (Spike) in World

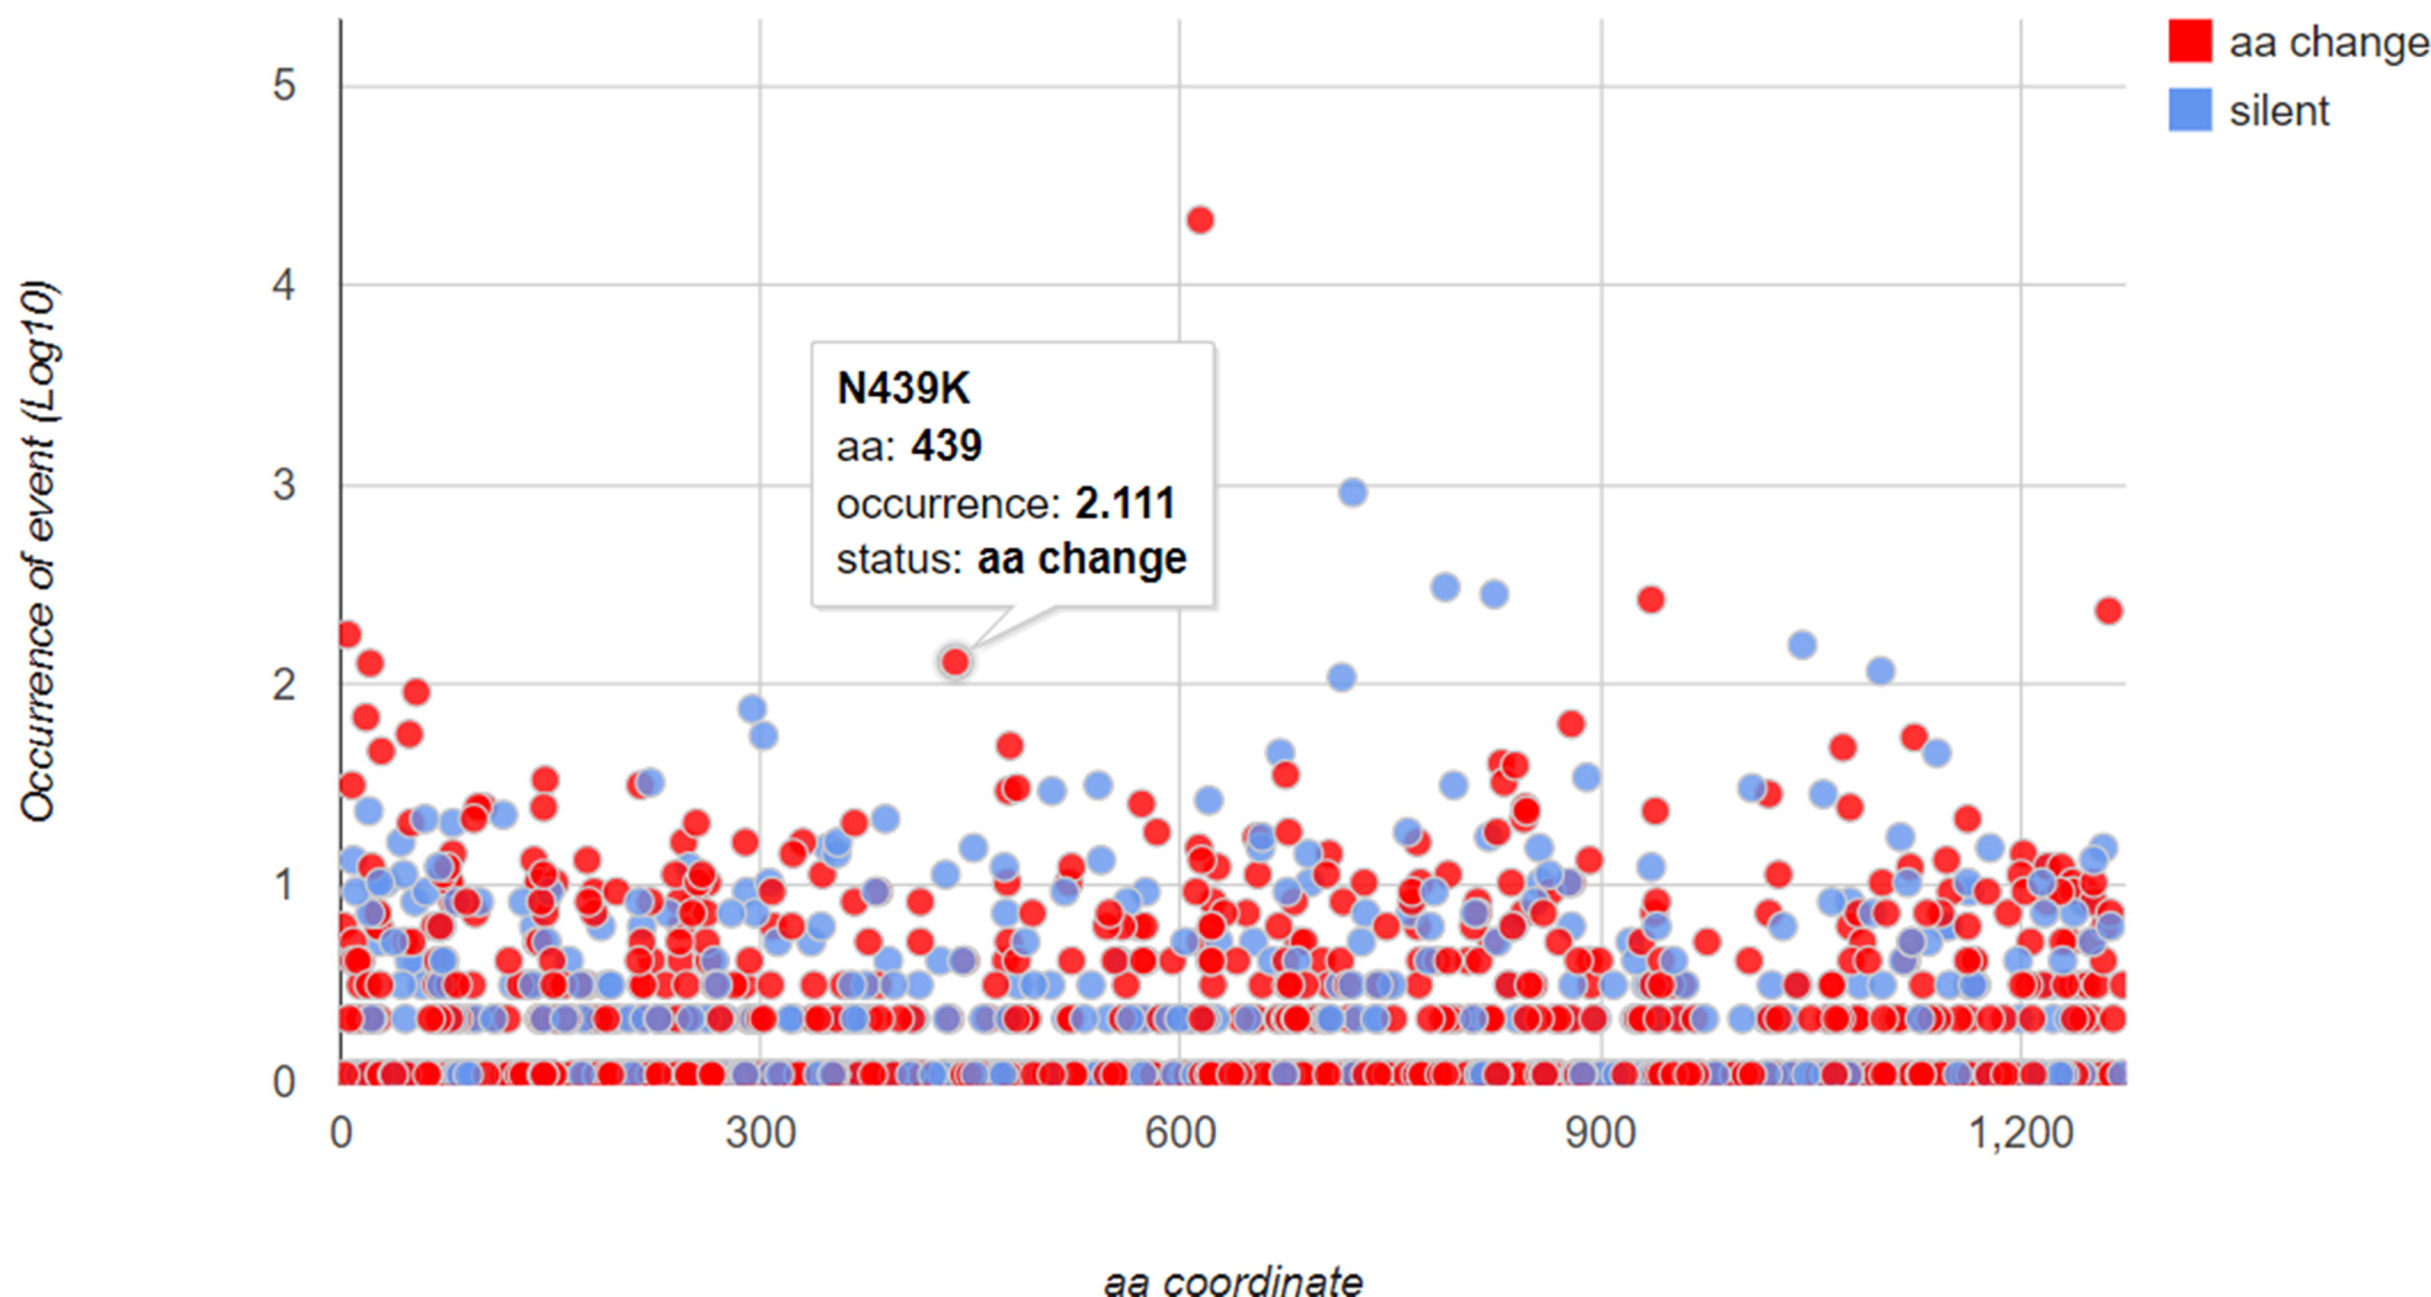

A

## Showing results for World

Download Full table (CSV format)

Show 10 entries

Search:

| sample         | country     | refpos | refvar | qvar | qpos  | qlength | protein | variant | varclass   | annotation                                              | varname      |
|----------------|-------------|--------|--------|------|-------|---------|---------|---------|------------|---------------------------------------------------------|--------------|
| EPI_ISL_415706 | Switzerland | 4      | A      | T    | 4     | 29903   | 5'UTR   | 4       | extragenic |                                                         | 5'UTR:4      |
| EPI_ISL_415706 | Switzerland | 241    | C      | T    | 241   | 29903   | 5'UTR   | 241     | extragenic |                                                         | 5'UTR:241    |
| EPI_ISL_415706 | Switzerland | 3037   | C      | T    | 3037  | 29903   | NSP3    | F106F   | SNP_silent | Predicted phosphoesterase, papain-like proteinase       | NSP3:F106F   |
| EPI_ISL_415706 | Switzerland | 14408  | C      | T    | 14408 | 29903   | NSP12b  | P314L   | SNP        | RNA-dependent RNA polymerase, post-ribosomal frameshift | NSP12b:P314L |
| EPI_ISL_415706 | Switzerland | 15324  | C      | T    | 15324 | 29903   | NSP12b  | N619N   | SNP_silent | RNA-dependent RNA polymerase, post-ribosomal frameshift | NSP12b:N619N |
| EPI_ISL_415706 | Switzerland | 23403  | A      | G    | 23403 | 29903   | S       | D614G   | SNP        | Spike                                                   | S:D614G      |
| EPI_ISL_416497 | France      | 4      | A      | T    | 4     | 29862   | 5'UTR   | 4       | extragenic |                                                         | 5'UTR:4      |
| EPI_ISL_416497 | France      | 241    | C      | T    | 241   | 29862   | 5'UTR   | 241     | extragenic |                                                         | 5'UTR:241    |
| EPI_ISL_416497 | France      | 2416   | C      | T    | 2416  | 29862   | NSP2    | Y537Y   | SNP_silent | Non-Structural protein 2                                | NSP2:Y537Y   |
| EPI_ISL_416497 | France      | 3037   | C      | T    | 3037  | 29862   | NSP3    | F106F   | SNP_silent | Predicted phosphoesterase, papain-like proteinase       | NSP3:F106F   |

Showing 1 to 10 of 192,208 entries

Previous

1

2

3

4

5

...

19221

Next

B

## Mutational overview for United Kingdom

Most mutated samples

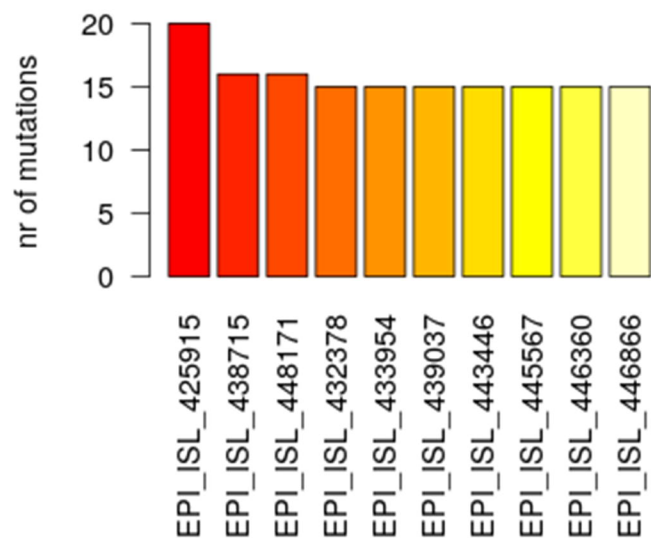

Overall mutations per sample

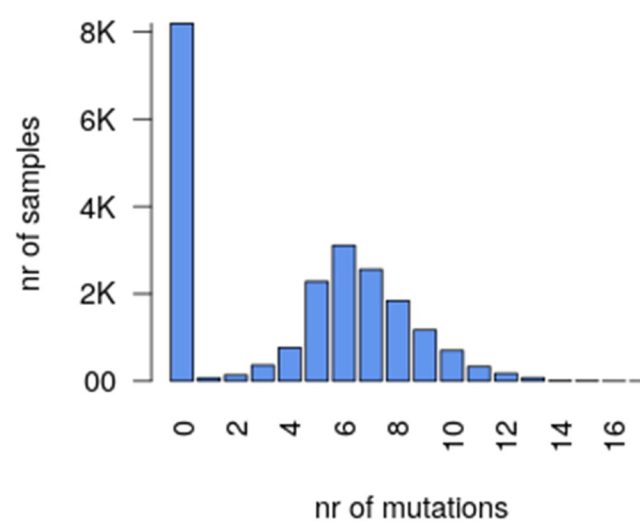

Most frequent events per class

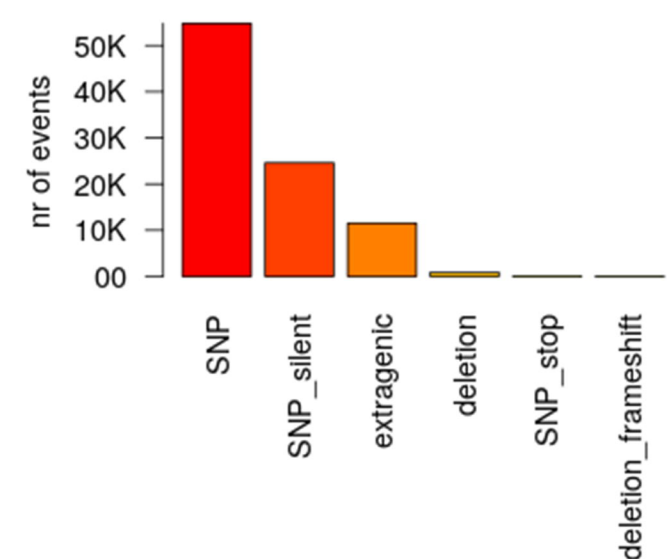

Most frequent events per type

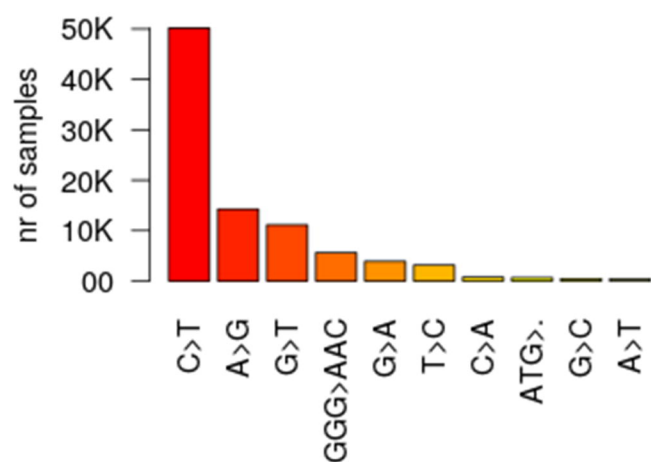

Most frequent events (nucleotide)

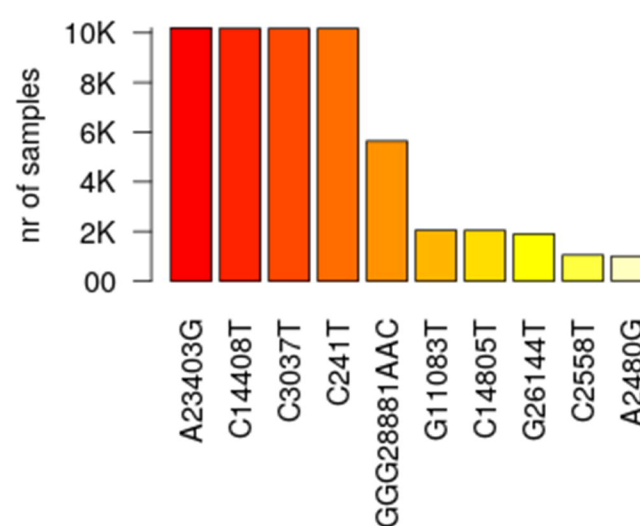

Most frequent events (protein)

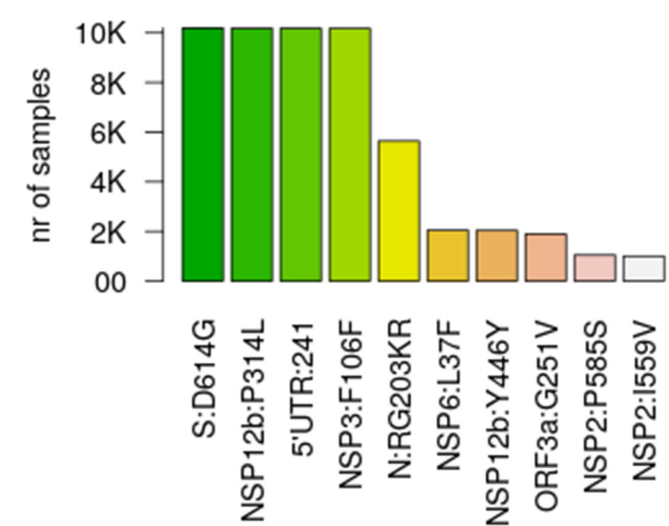



# Analysis of mutations over time

Select Country:

World

Select Mutation:

S:D614G

S:D614G abundance in World

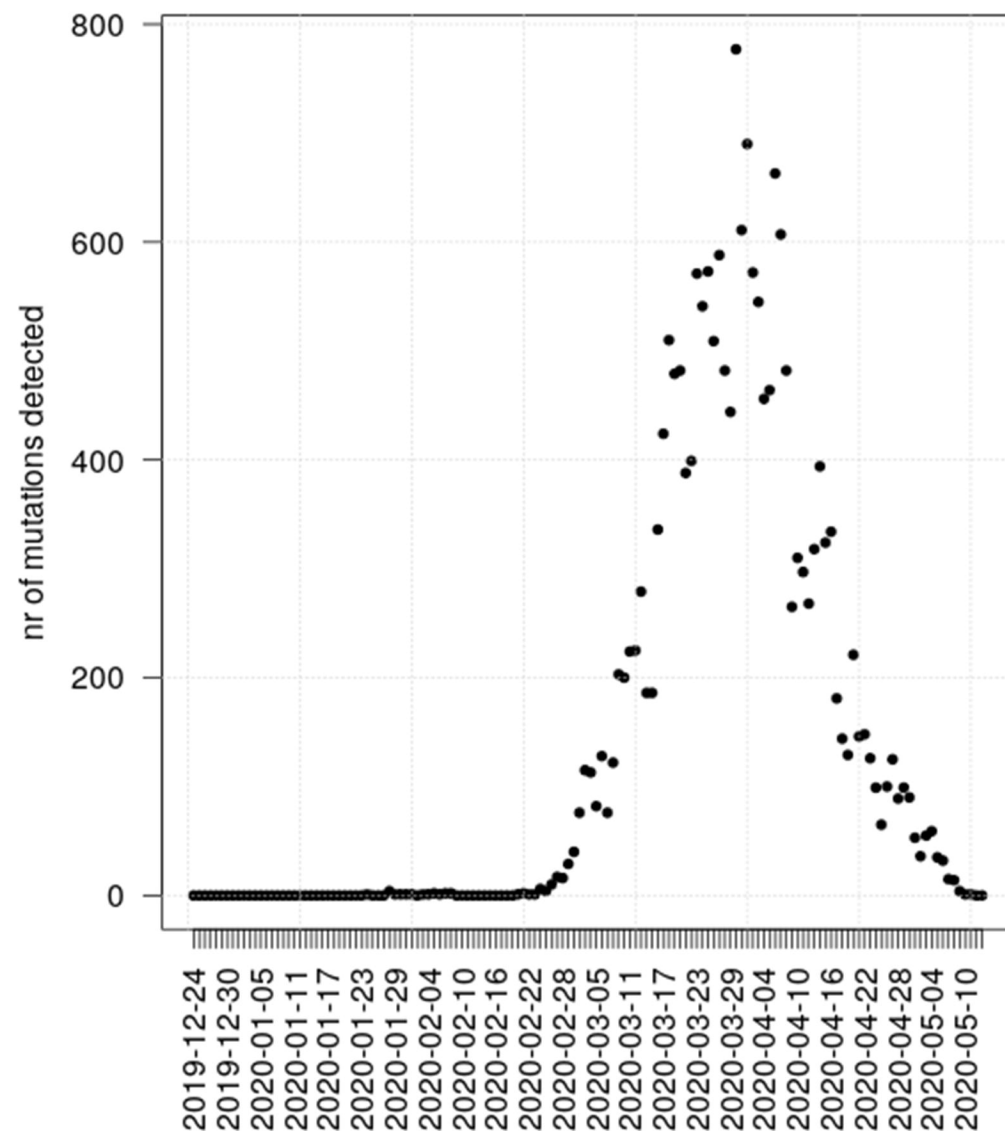

S:D614G frequency in World

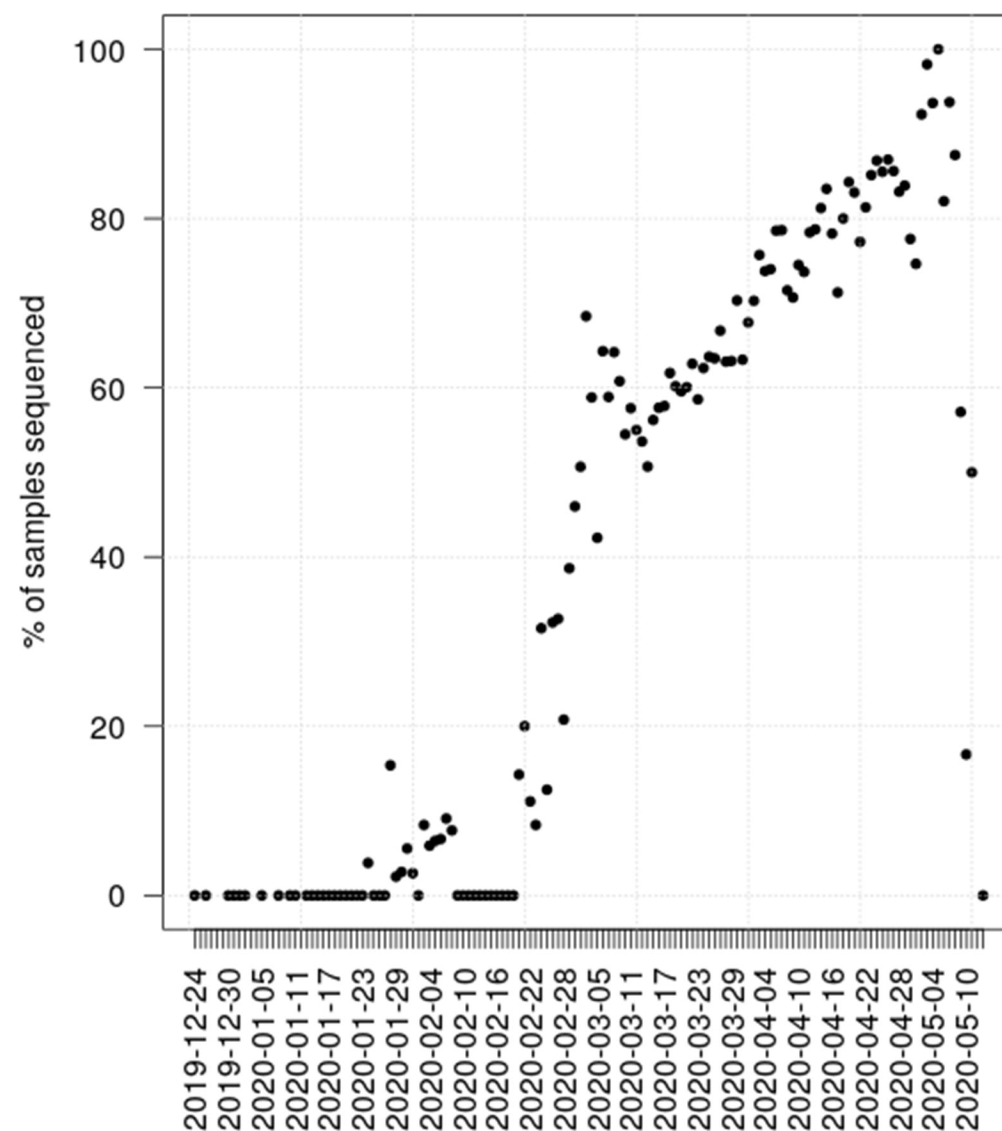

Source: https://www.biorxiv.org/content/10.1101/2020.05.31.124966v1.full.pdf
