---

1 **List of email addresses and ORCIDs for all authors:**

2 Daniele Mercatelli, [daniele.mercatelli2@unibo.it](mailto:daniele.mercatelli2@unibo.it), ORCID 0000-0003-3228-0580

3 Luca Triboli, [luca.triboli@studio.unibo.it](mailto:luca.triboli@studio.unibo.it), ORCID 0000-0002-1261-0637

4 Eleonora Fornasari, [eleonora.fornasari@ordingbo.it](mailto:eleonora.fornasari@ordingbo.it), ORCID 0000-0002-7636-085X

5 Forest Ray, [forest.ray@zoho.com](mailto:forest.ray@zoho.com), ORCID 0000-0002-8655-7066

6 Federico M. Giorgi, [federico.giorgi@unibo.it](mailto:federico.giorgi@unibo.it), ORCID 0000-0002-7325-9908

7

8 ***coronapp*: A Web Application to Annotate and Monitor**

9 **SARS-CoV-2 Mutations**

10 Daniele Mercatelli<sup>1,#</sup>, Luca Triboli<sup>1,#</sup>, Eleonora Fornasari<sup>1</sup>, Forest Ray<sup>2</sup>, Federico M.  
11 Giorgi<sup>1,\*</sup>

12 <sup>1</sup> *Department of Pharmacy and Biotechnology, University of Bologna, Bologna,*  
13 *40126, Italy*

14 <sup>2</sup> *Department of Systems Biology, Columbia University Medical Center, New York*  
15 *City, 10032, United States*

16 # Equal contribution.

17 \* Corresponding author.

18 E-mail: [federico.giorgi@unibo.it](mailto:federico.giorgi@unibo.it) (Giorgi FM)

19

20 **Running title:** *Mercatelli D et al / coronapp – monitoring SARS-CoV-2 mutations*

21

22 Word number: 3531

23 Figure number: 3

24

25

26 **Abstract**

27 The avalanche of genomic data generated from the SARS-CoV-2 virus requires the  
28 development of tools to detect and monitor its mutations across the World. Here, we  
29 present a webtool, *coronapp*, dedicated to easily processing user-provided  
30 SARS-CoV-2 genomic sequences, in order to detect and annotate protein-changing  
31 mutations. This results in an up-to-date status of SARS-CoV-2 mutations, both  
32 worldwide and in user-selected countries. The tool allows users to highlight and  
33 prioritize the most frequent mutations in specific protein regions, and to monitor their  
34 frequency in the population over time.

35 The tool is available at <http://giorgilab.dyndns.org/coronapp/> and the full code is  
36 freely shared at <https://github.com/federicogiorgi/giorgilab/tree/master/coronapp>

37

38

39

40

41

42 **KEYWORDS:** COVID-19; SARS-CoV-2; mutations; web application

43

44

---

## 45 **Introduction**

46 SARS-CoV-2 is a novel pathogenic enveloped RNA beta-coronavirus causing a  
47 severe illness in human hosts known as coronavirus disease-2019 (COVID-19). The  
48 predominant COVID-19 illness is a viral pneumonia, often requiring hospitalization  
49 and in some cases intensive care [1]. With almost 6 million laboratory-confirmed  
50 positive cases worldwide as of 31 May 2020 and an estimated case fatality rate across  
51 204 countries of 5.2%, COVID-19 has become a global health challenge in only a few  
52 months [2]. SARS-CoV-2 infection depends on the recognition of host angiotensin  
53 converting enzyme 2 (ACE2), exposed on the cell surface in human lung tissues [3,4].  
54 SARS-CoV-2 spike glycoprotein binds ACE2, mediating membrane fusion and cell  
55 entry [5]. Upon cell entry, the virus subverts host cell molecular processes, inducing  
56 interferon responses and eventually apoptosis [6].

57 To date, much effort has been made to develop therapeutic strategies to limit  
58 SARS-CoV-2 transmission and replication, but no treatment or vaccine has proven  
59 effective against the virus, and repurposing of approved therapeutic agents has been  
60 the main practical approach to manage the emergency so far [7]. As viruses mutate  
61 during replication, the emergence of SARS-CoV-2 sub-strains and the challenge of a  
62 probable antigenic drift require attention, especially for vaccine development [8].

63 Although sequence analyses of SARS-CoV-2 have shown that genomic variability  
64 is very low [9], new SARS-CoV-2 mutation hotspots are emerging due to the high  
65 number of infected individuals across countries and to viral replication rates [10].  
66 Three major SARS-CoV-2 clades known as clade G, V, and S have emerged, showing  
67 a different geographical prevalence [10]. The most frequent mutation detected so far  
68 defines the G clade and causes an aminoacidic change, aspartate (D) or glycine (G), at  
69 position 614 (D614G) of the viral Spike protein [11].

70 Continual genomic surveillance should be considered to monitor the possible  
71 appearance of viral subtypes characterized by altered tropism, or causing more  
72 aggressive symptoms. Constant and widespread monitoring of mutations is also a

---

73 powerful means of informing drug development and global or local pandemic  
74 management. The Global Initiative on Sharing All Influenza Data (GISAID) has  
75 collected to date (31 May 2020) over 30,000 publicly accessible SARS-CoV-2  
76 sequences. The GISAID effort has made it possible to compare genomes on a  
77 geographical and temporal scale and an increasing number of laboratories have started  
78 to sequence COVID-19 patient samples worldwide [13,14]. Several online tools have  
79 been developed to monitor the evolution of the virus from a phylogenetic perspective,  
80 such as Nextstrain [15], or to visualize epidemiological data such as number of cases  
81 and deaths [16]. However, no tool currently exists to annotate user-provided  
82 SARS-CoV-2 genomic sequences, which may derive from specific GISAID subsets  
83 or from sequencing efforts of individual laboratories. Neither does any tool  
84 specifically monitor the prevalence of specific SARS-CoV-2 mutations associated to  
85 particular geographic regions or protein locations, nor their frequency in the  
86 population over time.

87 To overcome these limitations, we have developed *coronapp*, a web application  
88 with two purposes: real-time tracking of SARS-CoV-2 mutational status and  
89 annotation of user-provided viral genomic sequences. Our tool enables users to easily  
90 perform genomic comparisons and provides an instrument to monitor SARS-CoV-2  
91 genomic variance, both worldwide and by uploading custom and locally produced  
92 genomic sequences. The webtool is available at <http://giorgilab.dyndns.org/coronapp/>  
93 and the full source code is shared on Github  
94 <https://github.com/federicogiorgi/giorgilab/tree/master/coronapp>

## 96 **Results**

97 The webtool *coronapp* is available at the website  
98 <http://giorgilab.dyndns.org/coronapp/> and it automatically provides the user with the  
99 current status of SARS-CoV-2 mutations worldwide. The app also allows users to

---

100 annotate user-provided sequences (Figure 1 A). There are multiple functionalities of  
101 *coronapp*, described in the following paragraphs.

102

### 103 **Current Status of SARS-CoV-2 mutational data**

104 A worldwide analysis is shown, generated using data from GISAID. Specifically, we  
105 processed all SARS-CoV-2 complete (>29,000 sequenced nucleotides) genomic  
106 sequences, excluding low-quality sequences (>5% undefined nucleotide “N”) and  
107 viruses extracted from non-human hosts.

108 The underlying database is updated weekly, and we provide the date of the last  
109 version as a reference for studies based on the data provided. We indicate the number  
110 of samples processed and the total number of mutational events detected (Figure 1 A).  
111 We also show the number of distinct mutated loci. Currently, this number is slightly  
112 below 11,000, meaning that less than half of the original Wuhan SARS-CoV-2  
113 genome has been affected by mutations and/or sequencing errors (the full length of  
114 the reference genome is 29,903 nucleotides, based on sequence id NC\_045512.2).

115

### 116 **Mutation frequency in SARS-CoV-2 proteins**

117 We show the frequency of mutations along the length of every SARS-CoV-2 protein,  
118 reporting in the X-axis the amino acid position and on the Y-axis its frequency, either  
119 as number of observed samples carrying the mutation, the base 10 logarithm of that  
120 number, or the percentage over all sequenced samples. In the example in Figure 1 B,  
121 we show the most frequent mutations affecting the viral Spike protein S,  
122 distinguishing silent mutations and amino acid-changing mutations (including the  
123 introduction of STOP codons). For Spike, the mutations appear to be evenly  
124 distributed in frequency along the protein length, with the most frequent mutation  
125 being the aforementioned D614G. Mouse-over functionality is provided to allow the  
126 user to identify the selected mutation (N439K in Figure 1 B).

127

---

## 128 **The SARS-CoV-2 mutation table**

129 The user can visualize or download the full table of mutations on which the webtool  
130 operates (Figure 2 A). This table is frequently updated and allows the user to specify a  
131 worldwide or a country-specific dataset. The table also provides a Search function to  
132 look for specific variants or sample ids, and it can be viewed online or downloaded in  
133 full as a Comma-Separated Values (CSV) file.

134 The table shows every mutation in a specific geographical area, reporting:

- 135 • the GISAID sample ID (useful for cross-reference with the GISAID database  
136 and other analyses based on it, e.g. Nexstrain).
- 137 • The country where the sample was collected.
- 138 • The position of the mutation, on the reference genome (refpos) and on the  
139 sample (qpos).
- 140 • The sequence at the mutation site, on the reference genome (refvar) and on the  
141 sample (qvar).
- 142 • The length of the sample genome (qlength); the reference genome is 29,903  
143 nucleotides long.
- 144 • The protein affected by the mutation or, if the mutation is extragenic, the  
145 denomination of the untranslated region (UTR), e.g. 5'UTR or 3'UTR.
- 146 • The effect of the mutation on the amino acid sequence of the protein (variant).  
147 This uses the canonical mutational standard, indicating the original amino  
148 acid(s), the position on the protein, and the mutated amino acid(s). An asterisk  
149 (\*) indicates a STOP codon, while the letters indicate amino acids in IUPAC  
150 code. E.g. a mutation P315L indicates a leucine mutation (L) on the amino  
151 acid location 315, normally occupied by a proline (P). Nucleotide mutations  
152 can be silent, i.e. not yielding any aminoacidic change, e.g. the mutation  
153 F106F, where the codon of phenylalanine 106 is affected but without changing  
154 the corresponding amino acid. As in the previous column, mutations affecting  
155 UTR regions are simply reported as the location of the nucleotide affected.

- 
- 156       • The class of the mutation, of which there are currently 10 types:
- 157           ○ SNP: a change of one or more nucleotides, determining a change in
- 158           amino acid sequence.
- 159           ○ SNP\_stop: a change of one or more nucleotides, yielding the generation
- 160           of one or more STOP codons.
- 161           ○ SNP\_silent: a change of one or more nucleotides with no effect in
- 162           protein sequence.
- 163           ○ Insertion: the insertion of 3 (or multiples of 3) nucleotides, causing the
- 164           addition of 1 or more amino acids to the protein sequence.
- 165           ○ Insertion\_stop: the insertion of 3 (or multiples of 3) nucleotides, causing
- 166           the generation of a novel STOP codon.
- 167           ○ Insertion\_frameshift: the insertion of nucleotides not as multiples of 3,
- 168           causing a frameshift mutation.
- 169           ○ Deletion: the deletion of 3 (or multiples of 3) nucleotides, causing the
- 170           removal of 1 or more amino acids to the protein sequence.
- 171           ○ Deletion\_stop: the removal of 3 (or multiples of 3) nucleotides, causing
- 172           the generation of a novel STOP codon.
- 173           ○ Deletion\_frameshift: the deletion of nucleotides not as multiples of 3,
- 174           causing a frameshift mutation.
- 175           ○ Extragenic: a mutation affecting intergenic or UTR regions.
- 176       • The extended annotation of the protein region affected by the mutation (e.g.
- 177       “Spike” for “S” or “Predicted phosphoesterase, papain-like proteinase” for
- 178       NSP3, the Non-Structural Protein 3).
- 179       • The full name of the variant (varname), in the format
- 180       proteinName:AApositionAA, to allow for unique denomination of viral
- 181       proteome variants.

182

183   **Mutational overview**

---

184 The user is also provided with a general overview of the mutational status of the  
185 selected country or the entire world (Figure 2 B). Six bar plots provide a summary and  
186 highlights of the dataset, specifically:

- 187 • The most mutated samples, indicating which samples (in GISAID IDs) carry  
188 the highest number of mutations
- 189 • The overall mutations per sample, indicating the distributions of mutations per  
190 sample. It has been previously reported [10] that the current mode for  
191 mutation number compared to the reference NC\_045512.2 genome is 7.5.
- 192 • The most frequent events per class. Classes are the same as reported in the  
193 mutation table and are described in the previous paragraph.
- 194 • The most frequent events per type. Individual mutation types are shown as  
195 specific nucleotides events, e.g. cytosine to thymidine transitions (C>T),  
196 guanosine to thymidine transversion (G>T) or even multinucleotide mutations  
197 (e.g. GGG>AAC, observed in the Nucleocapsid protein). As reported before,  
198 nucleotide transitions seem to be the most abundant SARS-CoV-2 type of  
199 mutational event worldwide [11].
- 200 • The most frequent events, either in nucleotide coordinates or in aminoacidic  
201 coordinates. Currently, the most frequent events are four mutations affecting  
202 SARS-CoV-2 genomes belonging to clade G, which is the most sequenced  
203 worldwide and predominant in Europe. These mutations are A23403G  
204 (associated to the already mentioned D614G mutation in the Spike protein),  
205 C3037T, C14408T and C241T.

206

### 207 **Analysis of mutations over time**

208 The *coronapp* webtool allows users to monitor the abundance and frequency of any  
209 SARS-CoV-2 mutation in any country specified (Figure 3). Both plots in this section  
210 report continuous dates on the X-axis, starting on the day of the first collected  
211 SARS-CoV-2 genome available on GISAID: December 24, 2019.



---

212 The “abundance” plot reports on the Y-axis the number of samples carrying a  
213 selected mutation in a particular day, in the specified country or worldwide. Since the  
214 date reported is the collection date (not the submission date to the GISAID database),  
215 there is usually a drop towards the right part of the plot, as there are fewer sequences  
216 collected approaching the day of the analysis. The “frequency” plot on the other hand  
217 normalizes the abundance of mutations by the total number of sequences generated on  
218 each day. The plot currently shows a sharp increase in clade G-associated mutations  
219 (e.g. S:D614G), as these mutations are most frequent in countries where sequencing is  
220 more pervasive (e.g. United Kingdom).

221

### 222 **Annotation of user-provided SARS-CoV-2 genomic sequence.**

223 *coronapp* provides the user with the optional possibility of uploading one or more  
224 SARS-CoV-2 genomic sequences, which can be complete or partial. The format of  
225 the sequences is standard FASTA, and an example input FASTA containing 12  
226 sequences is provided (Figure 1 A). The analysis is almost instantaneous and shows  
227 an overall breakdown of the most mutated samples and most frequent mutations in the  
228 dataset. Moreover, a full table of all detected mutations is provided: this can be  
229 visualized and searched on the web browser or downloaded as a standard CSV file.  
230 Finally, a mutation frequency plot is provided, allowing the user to visualize mutation  
231 frequency in selected proteins.

232 The user can easily return to the worldwide status of the app by refreshing or  
233 reopening the page.

234

### 235 **Discussion**

236 Our webtool *coronapp* provides a fast, simple tool to annotate user-provided  
237 SARS-CoV-2 genomes and visualize all mutations currently present in viral  
238 sequences collected worldwide. The results provided by this instrument can have  
239 several applications. The main purpose of *coronapp* is to help medical laboratories at

---

240 the front lines of COVID-19 fight with the opportunity to quickly define the  
241 mutational status of their sequences, even without dedicated bioinformaticians.

242 Additionally, it enables scientists to perform mutational co-variance analyses and  
243 to identify present and future significant functional interactions between viral  
244 mutations, as previously attempted for the influenza virus and the human  
245 immunodeficiency virus (HIV) [17]. Another application is the identification of the  
246 most frequent mutations in specific protein regions: for example, our tool can quickly  
247 identify that the most frequent mutation in the Spike protein, D614G, lies outside the  
248 known interaction domain with the human protein ACE2, which spans roughly  
249 between Spike amino acids 330 and 530 [18].

250 A recently published structural model simulating the effect of the D614G mutation  
251 on the 3D structure of the spike protein has suggested that this mutation may result in  
252 a viral particle which binds ACE2 receptors less efficiently, due to the masking of the  
253 host receptor binding site on viral spikes [12]. The same researchers have reported a  
254 possible correlation of the D614G form with increased case fatality rates,  
255 hypothesizing that this mutation may lead to a viral form which is better suited to  
256 escape immunologic surveillance by eliciting a lower immunologic response [12].  
257 The *coronapp* analysis highlighted in Figure 1 B shows that a mutation located within  
258 the Spike/ACE2 interaction domain is the change of Asparagine (N) to a Lysine (K)  
259 in position 439 of the Spike sequence; this mutation could affect the protein folding or  
260 its affinity with ACE2, as Asparagine is less charged than the basic amino acid  
261 Lysine.

262 One of *coronapp*'s key strengths is to help prioritize scientific efforts on specific  
263 aminoacidic variations that could affect the efficacy of anti-viral strategies or the  
264 development of a vaccine by tracking the most frequent mutations in the population.  
265 A further novelty of *coronapp* is that it provides a mean to assess the growth or  
266 decline of specific mutations over time, in order to identify possible viral adaptation  
267 mechanisms.

268 We provide not only the webtool, but also all the underlying code for the  
269 annotation and visualization steps on a public Github repository, in order to help other  
270 computational scientists in the ongoing battle against COVID-19. Furthermore, the  
271 *coronapp* structure and concept could be expanded to other current and future  
272 pathogens as well (e.g. the seasonal influenza or HIV), in order to monitor the  
273 mutational status across proteins, countries and time.

274

## 275 **Materials and methods**

276 The webtool *coronapp* has been developed using the programming language R and is  
277 based on a Shiny server (current version 1.4.0.2) running on R version 3.6.1. The app  
278 is based on two distinct files, *server.R* and *ui.R*, managing the server functionalities  
279 and the browser visualization processes, respectively. The results visualization utilizes  
280 both basic R functions and Shiny functionalities; for tooltip functionality, *coronapp*  
281 uses the R package *googleVis* v0.6.4, which provides an interface between R and the  
282 Google visualization API [19].

283 The core of the annotation of the user-provided sequences rests in the NUCMER  
284 (Nucleotide Mummer) alignment tool, version 3.1 [20]. Nucmer output is processed  
285 by UNIX and R scripts provided in Github within the *server.R* file.

286

287

---

## 288 **Authors' contributions**

289 DM drafted the manuscript and performed the mutational analysis and literature  
290 search. LT developed the user interface code and drafted the methodological parts of  
291 the manuscript. EF worked on graphical interface of the webtool. FR wrote the  
292 manuscript and performed literature search. FMG designed the study, developed the  
293 server code, finalized the manuscript and provided financial support. All authors  
294 tested the webtool and provided original contributions to its development. All authors  
295 read and approve the final manuscript.

296

## 297 **Competing interests**

298 The authors have declared no competing interests.

299

## 300 **Acknowledgements**

301 We thank the Italian Ministry of University and Research for their support, under the  
302 Montalcini Grant 2016.

303

## 304 **References**

- 305 [1] Guan W-J, Ni Z-Y, Hu Y, Liang W-H, Ou C-Q, He J-X, et al. Clinical  
306 Characteristics of Coronavirus Disease 2019 in China. *N Engl J Med*  
307 2020;382:1708–20. <https://doi.org/10.1056/NEJMoa2002032>.
- 308 [2] Phua J, Weng L, Ling L, Egi M, Lim C-M, Divatia JV, et al. Intensive care  
309 management of coronavirus disease 2019 (COVID-19): challenges and  
310 recommendations. *Lancet Respir Med* 2020.  
311 [https://doi.org/10.1016/S2213-2600\(20\)30161-2](https://doi.org/10.1016/S2213-2600(20)30161-2).
- 312 [3] Zhang H, Penninger JM, Li Y, Zhong N, Slutsky AS. Angiotensin-converting  
313 enzyme 2 (ACE2) as a SARS-CoV-2 receptor: molecular mechanisms and  
314 potential therapeutic target. *Intensive Care Med* 2020;46:586–90.  
315 <https://doi.org/10.1007/s00134-020-05985-9>.
- 316 [4] Guzzi PH, Mercatelli D, Ceraolo C, Giorgi FM. Master Regulator Analysis of the  
317 SARS-CoV-2/Human Interactome. *J Clin Med* 2020;9:982.  
318 <https://doi.org/10.3390/jcm9040982>.
- 319 [5] Ou X, Liu Y, Lei X, Li P, Mi D, Ren L, et al. Characterization of spike  
320 glycoprotein of SARS-CoV-2 on virus entry and its immune cross-reactivity with

- 
- 321 SARS-CoV. *Nat Commun* 2020;11:1620.  
322 <https://doi.org/10.1038/s41467-020-15562-9>.
- 323 [6] Blanco-Melo D, Nilsson-Payant BE, Liu W-C, Uhl S, Hoagland D, Møller R, et  
324 al. Imbalanced Host Response to SARS-CoV-2 Drives Development of  
325 COVID-19. *Cell* 2020;181:1036-1045.e9.  
326 <https://doi.org/10.1016/j.cell.2020.04.026>.
- 327 [7] Tu Y-F, Chien C-S, Yarmishyn AA, Lin Y-Y, Luo Y-H, Lin Y-T, et al. A Review  
328 of SARS-CoV-2 and the Ongoing Clinical Trials. *Int J Mol Sci* 2020;21.  
329 <https://doi.org/10.3390/ijms21072657>.
- 330 [8] Koyama T, Weeraratne D, Snowden JL, Parida L. Emergence of Drift Variants  
331 That May Affect COVID-19 Vaccine Development and Antibody Treatment.  
332 *Pathog Basel Switz* 2020;9. <https://doi.org/10.3390/pathogens9050324>.
- 333 [9] Ceraolo C, Giorgi FM. Genomic variance of the 2019-nCoV coronavirus. *J Med*  
334 *Virool* 2020;92:522–8. <https://doi.org/10.1002/jmv.25700>.
- 335 [10] Mercatelli D, Giorgi FM. Geographic and Genomic Distribution of SARS-CoV-2  
336 Mutations. Preprints; 2020. <https://doi.org/10.20944/preprints202004.0529.v1>.
- 337 [11] Chiara M, Horner DS, Gissi C, Pesole G. Comparative genomics suggests limited  
338 variability and similar evolutionary patterns between major clades of  
339 SARS-CoV-2. *BioRxiv*; 2020. <https://doi.org/10.1101/2020.03.30.016790>.
- 340 [12] Becerra-Flores M, Cardozo T. SARS-CoV-2 viral spike G614 mutation exhibits  
341 higher case fatality rate. *Int J Clin Pract* 2020. <https://doi.org/10.1111/ijcp.13525>.
- 342 [13] Gudbjartsson DF, Helgason A, Jonsson H, Magnusson OT, Melsted P, Norddahl  
343 GL, et al. Spread of SARS-CoV-2 in the Icelandic Population. *N Engl J Med*  
344 2020. <https://doi.org/10.1056/NEJMoa2006100>.
- 345 [14] Fauver JR, Petrone ME, Hodcroft EB, Shioda K, Ehrlich HY, Watts AG, et al.  
346 Coast-to-Coast Spread of SARS-CoV-2 during the Early Epidemic in the United  
347 States. *Cell* 2020;181:990-996.e5. <https://doi.org/10.1016/j.cell.2020.04.021>.
- 348 [15] Hadfield J, Megill C, Bell SM, Huddleston J, Potter B, Callender C, et al.  
349 Nextstrain: real-time tracking of pathogen evolution. *Bioinformatics*  
350 2018;34:4121–3. <https://doi.org/10.1093/bioinformatics/bty407>.
- 351 [16] Max Roser EO-O Hannah Ritchie, Hasell J. Coronavirus Pandemic (COVID-19).  
352 Our World Data 2020.
- 353 [17] Sruthi CK, Prakash MK. Statistical characteristics of amino acid covariance as  
354 possible descriptors of viral genomic complexity. *Sci Rep* 2019;9:18410.  
355 <https://doi.org/10.1038/s41598-019-54720-y>.
- 356 [18] Lan J, Ge J, Yu J, Shan S, Zhou H, Fan S, et al. Structure of the SARS-CoV-2  
357 spike receptor-binding domain bound to the ACE2 receptor. *Nature*  
358 2020;581:215–20. <https://doi.org/10.1038/s41586-020-2180-5>.
- 359 [19] Gesmann M, de Castillo D. Using the Google visualisation API with R. *R J*  
360 2011;3:40–44.

---

361 [20]Delcher AL, Salzberg SL, Phillippy AM. Using MUMmer to Identify Similar  
362 Regions in Large Sequence Sets. *Curr Protoc Bioinforma* 2003;00:10.3.1-10.3.18.  
363 <https://doi.org/10.1002/0471250953.bi1003s00>.

364

## 365 **Figure legends**

### 366 **Figure 1 Overview of *coronapp***

367 **A.** Screenshot of the entry page of *coronapp* showing the basic tool description, the  
368 interface to upload user-provided sequences and the overall summary of the mutations  
369 detected worldwide. **B.** Common interface showing mutation frequency in  
370 SARS-CoV-2 proteins, with occurrence of the mutation on the Y-axis and protein  
371 coordinate on the X-axis. Red dots indicate amino acid (aa)-changing mutations, and  
372 blue dots indicate silent mutations. Tooltip functionality is also provided to identify  
373 and quantify each mutation on mouse-over.

374

### 375 **Figure 2 Mutation table and overview in *coronapp***

376 **A.** Result table of *coronapp*, available both for worldwide-precomputed and  
377 user-input analyses. A “download full table” button is provided to allow the user to  
378 perform larger-scale analyses autonomously. **B.** Barplots showing the most mutated  
379 samples, overall sample mutations and most frequent mutation events, classes and  
380 types. This analysis is also available both for worldwide-precomputed and user-input  
381 analyses.

382

### 383 **Figure 3 Analysis of mutations over time**

384 The final output of *coronapp*, showing the abundance of each user-specified mutation  
385 in any user-specified country (or worldwide). The left graph indicates the absolute  
386 amount of samples where the indicated mutation is detected. The right graph shows  
387 the same data normalized by total number of samples, as the percentage of samples  
388 sequenced in a specific day and carrying the mutation.

389

A

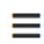

*coronapp* is a web application written in Shiny with a double purpose:

- Monitor SARS-CoV-2 worldwide mutations
- Annotate user-provided mutations

### Provide your own (multi)FASTA file

Browse...

No file selected

Example input multiFASTA

The FASTA annotator will discover and annotate every mutation present in the uploaded SARS-CoV-2 genomic sequences, even partial. The GFF3 genome annotation file

is available here <https://doi.org/10.1101/2020.05.31.121986> this version posted June 1, 2020. The copyright holder for this preprint (which was not certified by peer review) is the author/funder, who has granted bioRxiv a license to display the preprint in perpetuity. It is made available under aCC-BY-NC 4.0 International license.

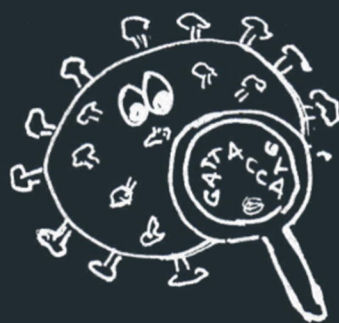

## Current Status of SARS-CoV-2 mutational data

updated May 30, 2020

Number of samples: 29668

Number of distinct mutated loci: 10458

Total number of mutational events: 203292

Select

Select Protein:

Log10

Country:

S

Percentage

World

Mutation frequency for protein S (Spike) in World

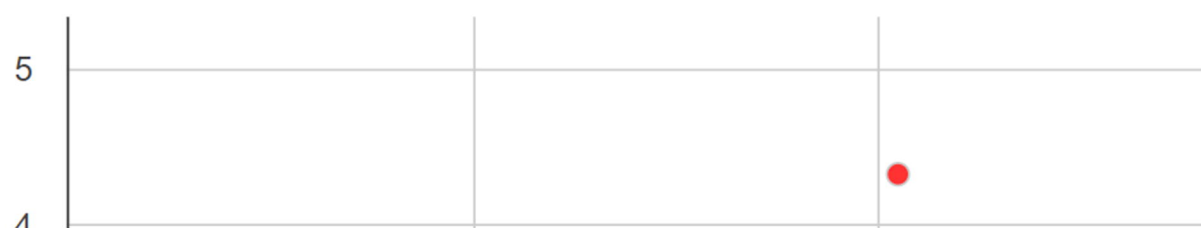

B

Mutation frequency for protein S (Spike) in World

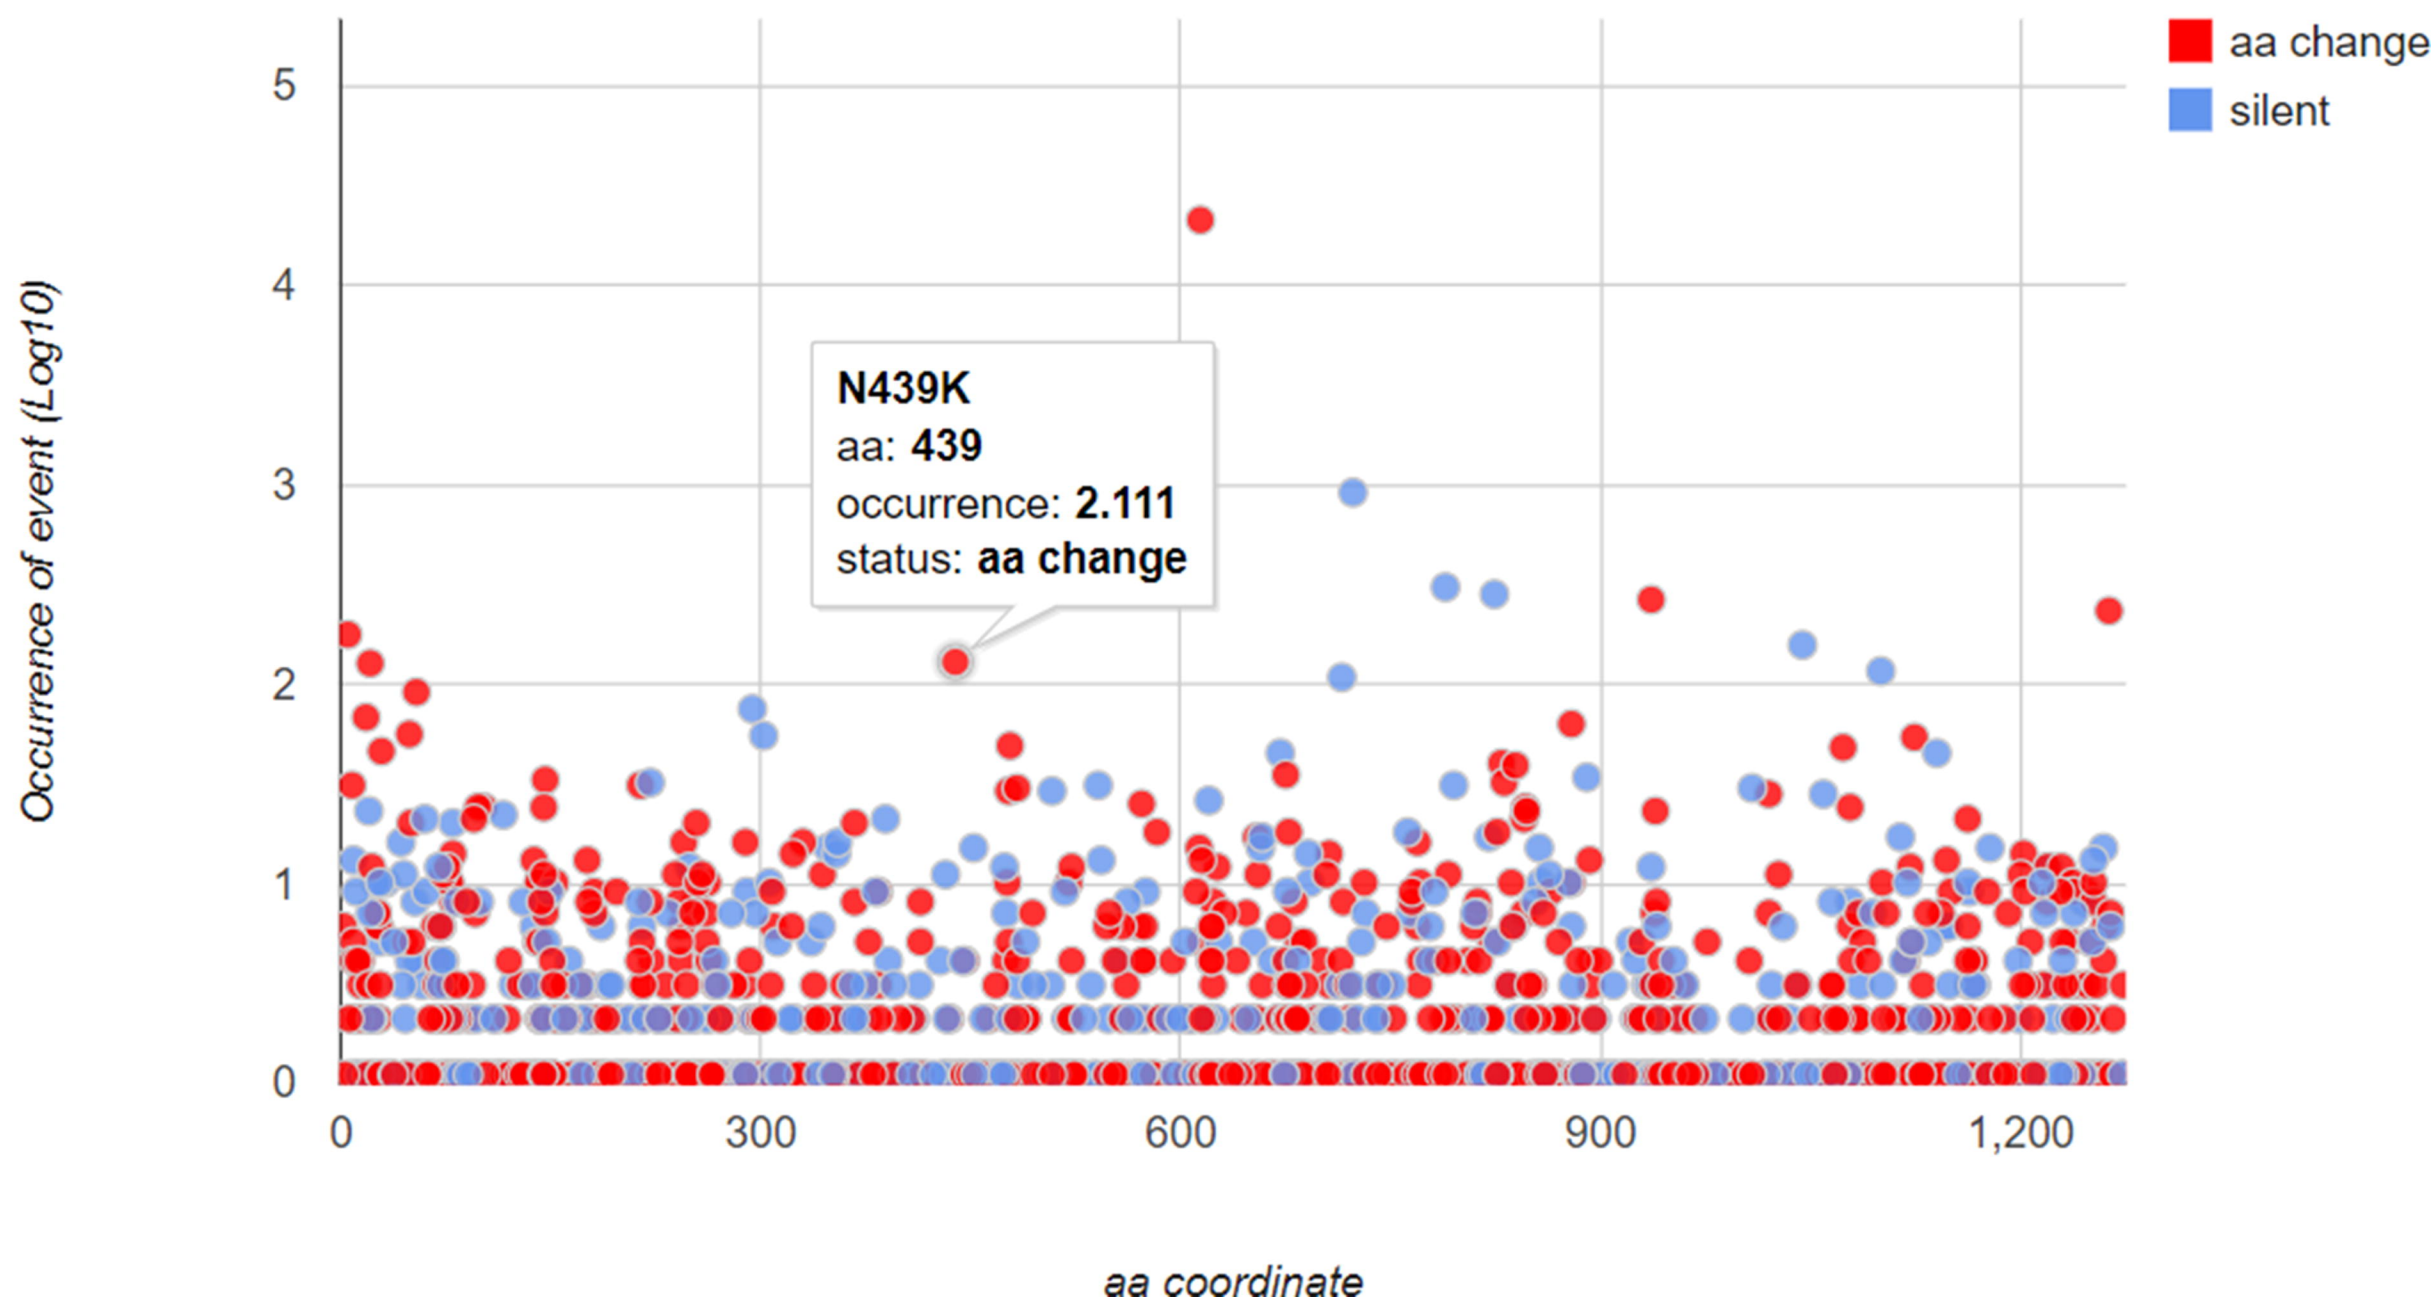

A

## Showing results for World

Download Full table (CSV format)

Show 10 entries

Search: 

| sample         | country     | refpos | refvar | qvar | qpos  | qlength | protein | variant | varclass   | annotation                                              | varname      |
|----------------|-------------|--------|--------|------|-------|---------|---------|---------|------------|---------------------------------------------------------|--------------|
| EPI_ISL_415706 | Switzerland | 4      | A      | T    | 4     | 29903   | 5'UTR   | 4       | extragenic |                                                         | 5'UTR:4      |
| EPI_ISL_415706 | Switzerland | 241    | C      | T    | 241   | 29903   | 5'UTR   | 241     | extragenic |                                                         | 5'UTR:241    |
| EPI_ISL_415706 | Switzerland | 3037   | C      | T    | 3037  | 29903   | NSP3    | F106F   | SNP_silent | Predicted phosphoesterase, papain-like proteinase       | NSP3:F106F   |
| EPI_ISL_415706 | Switzerland | 14408  | C      | T    | 14408 | 29903   | NSP12b  | P314L   | SNP        | RNA-dependent RNA polymerase, post-ribosomal frameshift | NSP12b:P314L |
| EPI_ISL_415706 | Switzerland | 15324  | C      | T    | 15324 | 29903   | NSP12b  | N619N   | SNP_silent | RNA-dependent RNA polymerase, post-ribosomal frameshift | NSP12b:N619N |
| EPI_ISL_415706 | Switzerland | 23403  | A      | G    | 23403 | 29903   | S       | D614G   | SNP        | Spike                                                   | S:D614G      |
| EPI_ISL_416497 | France      | 4      | A      | T    | 4     | 29862   | 5'UTR   | 4       | extragenic |                                                         | 5'UTR:4      |
| EPI_ISL_416497 | France      | 241    | C      | T    | 241   | 29862   | 5'UTR   | 241     | extragenic |                                                         | 5'UTR:241    |
| EPI_ISL_416497 | France      | 2416   | C      | T    | 2416  | 29862   | NSP2    | Y537Y   | SNP_silent | Non-Structural protein 2                                | NSP2:Y537Y   |
| EPI_ISL_416497 | France      | 3037   | C      | T    | 3037  | 29862   | NSP3    | F106F   | SNP_silent | Predicted phosphoesterase, papain-like proteinase       | NSP3:F106F   |

Showing 1 to 10 of 192,208 entries

Previous

1

2

3

4

5

...

19221

Next

B

## Mutational overview for United Kingdom

Most mutated samples

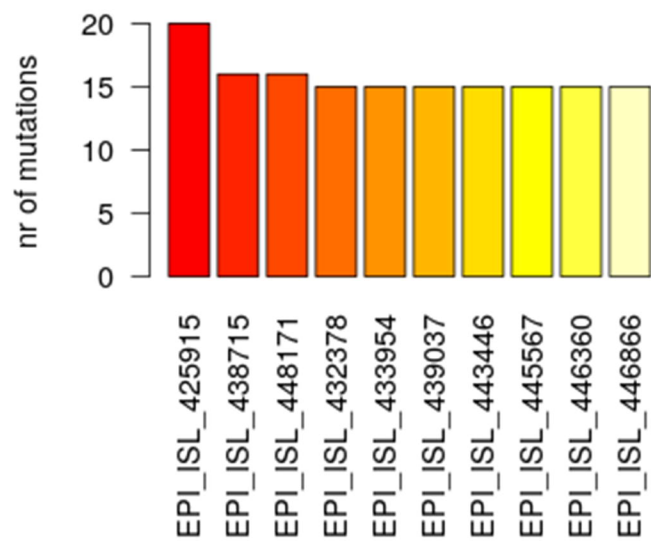

Overall mutations per sample

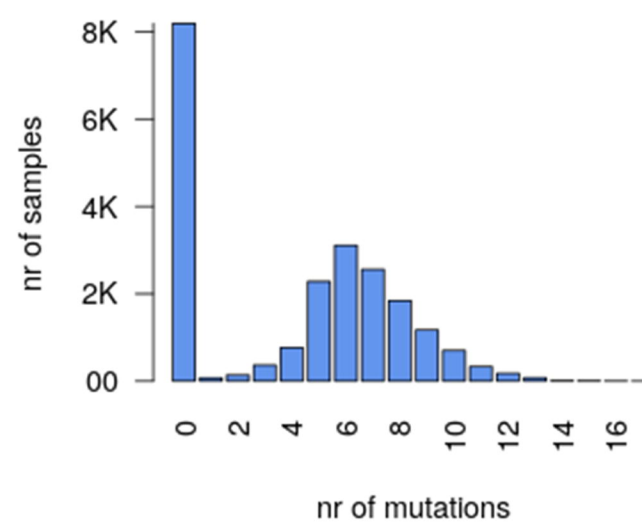

Most frequent events per class

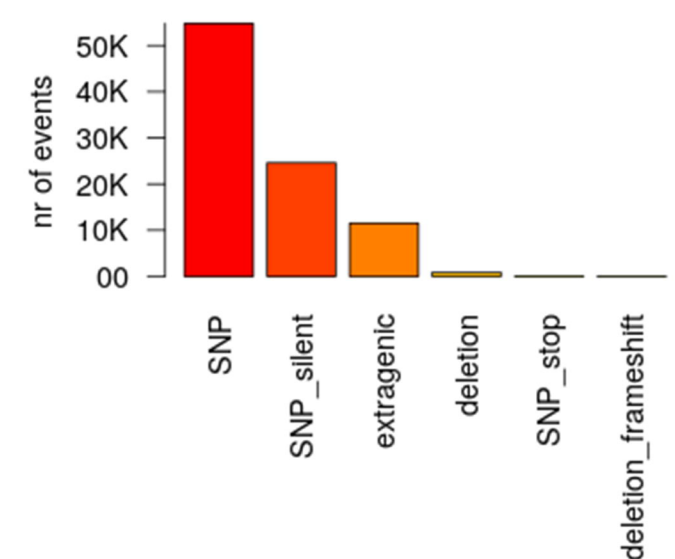

Most frequent events per type

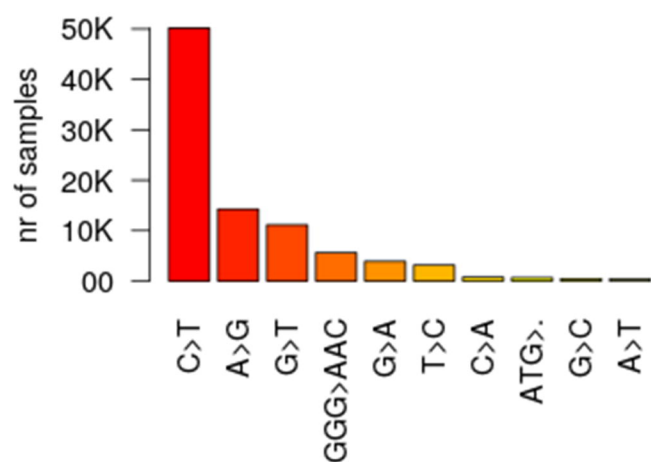

Most frequent events (nucleotide)

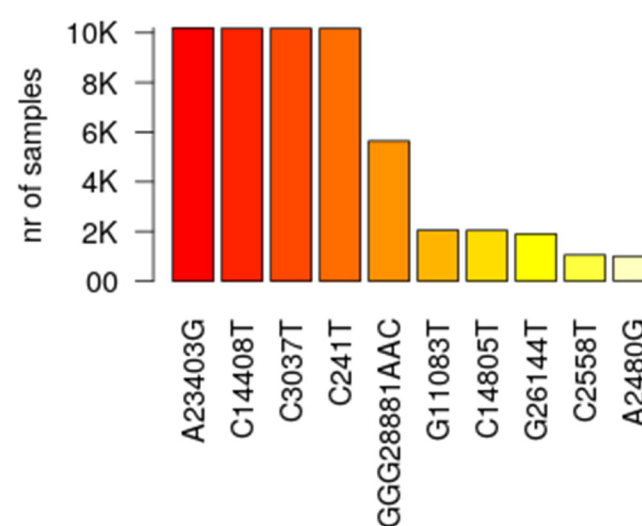

Most frequent events (protein)

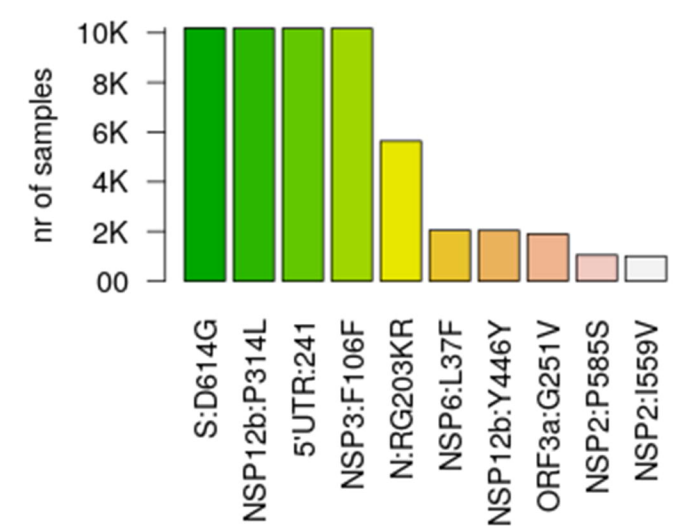



# Analysis of mutations over time

Select Country:

Select Mutation:

World

S:D614G

## S:D614G abundance in World

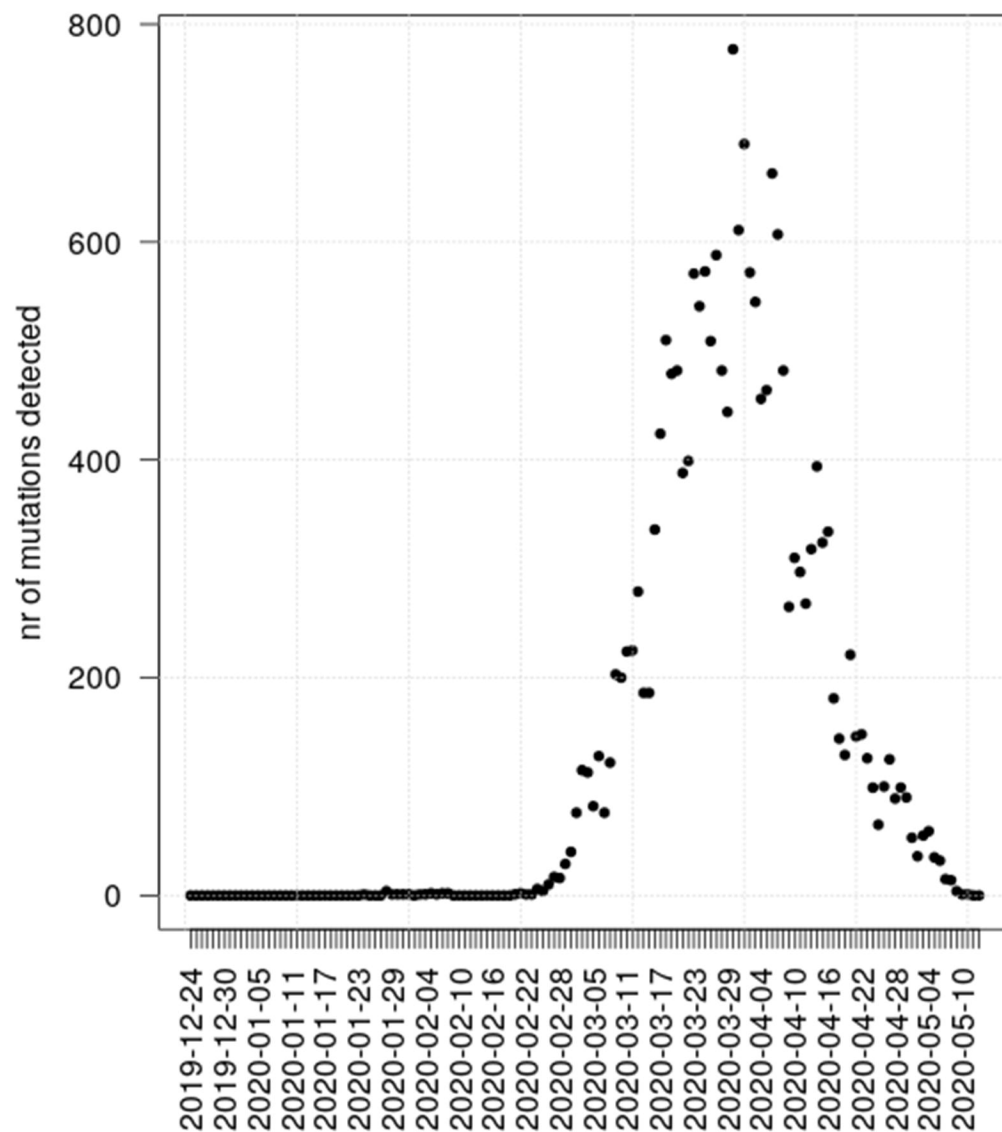

## S:D614G frequency in World

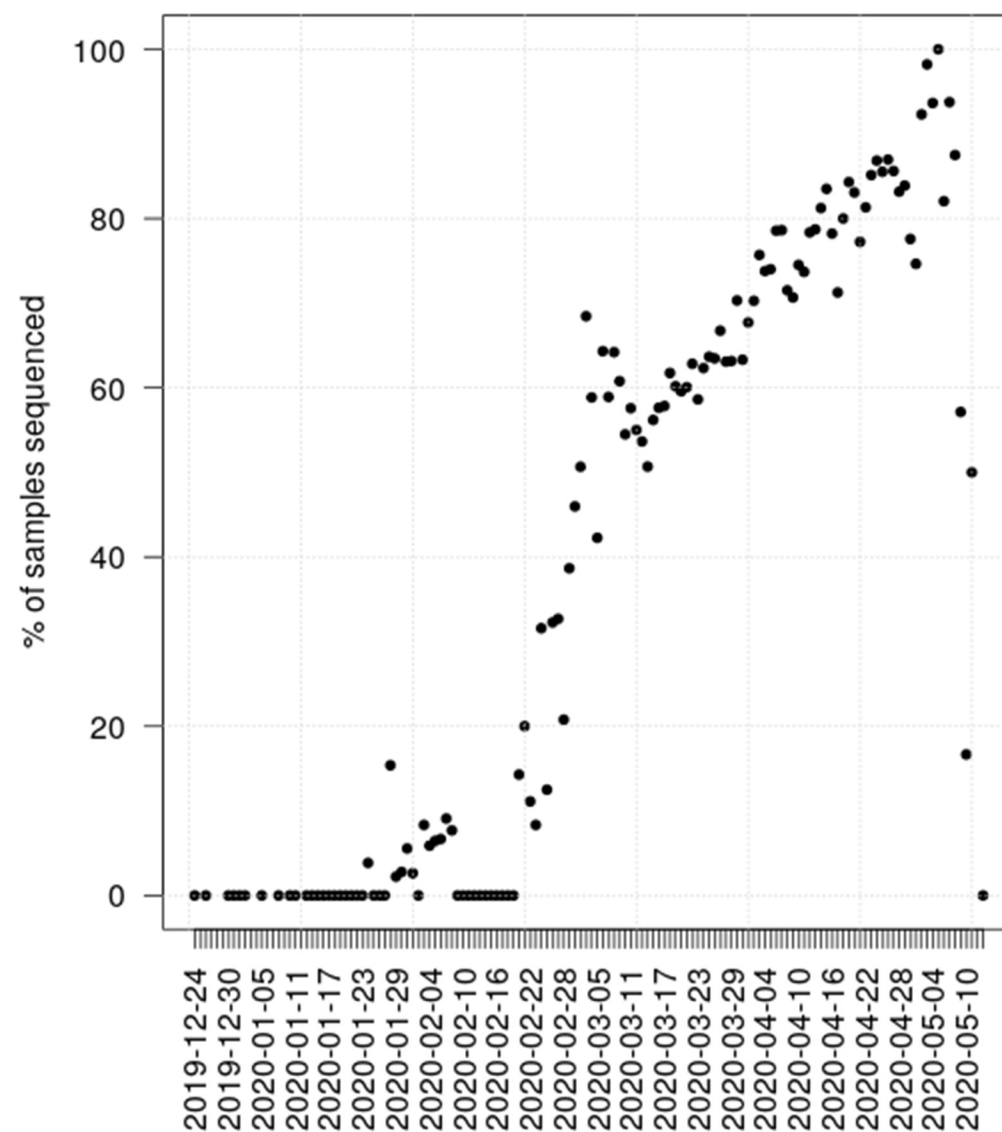

Source: https://www.biorxiv.org/content/10.1101/2020.05.31.124966v1.full.pdf
